# Supplementary material
Source: ML conference proceedings conference paper supplement (https://openreview.net/forum?id=FJVB_tkiWpw)
Supplement: supplementary_material [file attachment]

# Appendix

## A Experiments

### A.1 Complete Details of Experiment Setup

In this section, we provide a detailed experiment setup we have used. For completeness purposes, this section also includes details already mentioned in the main paper.

**Pre-trained models.** We use 35 PTMs having diverse architectures, pre-training methods and pre-training datasets. **Group 1** consists of models with different architectures. This group consists of 12 different architectures (CNNs and ViTs) trained on ImageNet-1k. The architectures are as follows: ResNet-50, ResNet-152 [30], ResNeXt-50 [82], DenseNet-169, DenseNet-201 [36], Inception v1 [72], Inception v3 [73], MobileNet v2 [69], EfficientNet-B2, EfficientNet-B4 [74], Swin-T, Swin-B [50]. **Group 2** consists of models pre-trained with different training methods. We use 10 ResNet-50s trained via following pre-training methods: Adversarial Training [53], BYOL [28], MoCo-v2 [18], InsDis [81], PIRL [54], DeepCluster-v2 [14], PCL-v2 [46], SeLa-v2 [4, 15], SwAV [15]. **Group 3** consists of models pre-trained on large-scale datasets. We used 13 different models trained on ImageNet-22k [67], YFCC-100M [75], IG-1B-Targeted [84], WebImageText [64]. A summary of the PTMs can be found in Table 3.

**Datasets.** We use six OoD datasets for our experiments. The details of these datasets are listed here. PACS [43] consists of 9,991 images from four domains (art, cartoons, photos, sketches) and seven classes. VLCS [24] consists of 10,729 images from four domains (Caltech101, LabelMe, SUN09, VOC2007) and five classes. Office-Home [77] has four domains (art, clipart, product, real) of common objects in office and home settings. The dataset has a total of 15,588 images belonging to 65 classes. TerraIncognita [10] contains photos of wild animals taken by camera traps installed at four different locations. It has a total of 24,788 images from 10 classes. DomainNet [63] is one of the most challenging OoD datasets. It has 586,575 images from six diverse domains (clipart, infographics, painting, quickdraw, real, sketch) belonging to 345 classes. NICO [31] consists of nearly 25,000 images from two superclasses: NICO-Animals (10 classes) and NICO-Vehicles (9 classes). We split the images of NICO-Animals and NICO-Vehicles into multiple domains according to [5] and combine validation and test sets as one domain to form four domains, separately.

**Ground-truth performance.** To get ground-truth performance, we train linear classifiers on top of PTMs following DomainBed [29]. The authors of DomainBed [29] argue for the hyper-parameter selection to be a part of the method selection criteria. Based on this argument, they propose a rigorous test bench. We follow their training and evaluation protocol, including dataset splits, hyper-parameter settings, optimizer, etc. We adopt the leave-one-domain-out cross-validation setup in DomainBed with 10 experiments for hyper-parameter selection and run 3 trials. We triple the number of iterations for DomainNet (5000 to 15000) as it is a larger dataset and requires more training [17] and decrease the number of experiments for hyper-parameter selection from 10 to 5.

**IID ranking methods.** We divide existing ranking methods into two groups. The first group consists of methods that employ PTM’s classification layer for ranking. These methods include NCE [76] and LEEP [58]. The second group consists of approaches that only use PTM’s extracted features. These methods include H-Score [8] and LogME [91]. Additionally, we also use kNN with  $k=200$  [81] as a baseline.

**Evaluation metrics.** To evaluate PTMs on OoD datasets with ranking methods, we follow leave-one-domain-out validation protocol [43]. For ZooD and kNN, we further adopt leave-one-domain-out validation for training domains and take average results as the performance prediction for the held-out test domain. To compute the correlation between ranking scores and ground-truth performance, we use two metrics. First, to compare the ranking of a transferability metric with accuracy, we employ Kendall’s coefficient  $\tau$  [38]. Unlike Pearson’s correlation,  $\tau$  measures correlation based on the order of two measures. Consequently, it is a better criterion for ranking. Second, to measure the performance of transferability metric for top-model selection, we utilize weighted Kendall’s coefficient  $\tau_w$  [78]. The  $\tau_w$  gives more weight to the ranking of top-performing models compared with the rest of the models. Therefore, it is a better comparative criterion for top model selection.

## A.2 Extended Ranking Results

In this section, we provide detailed and raw results for all 35 models on all six OoD datasets. Specifically, we provide raw scores assigned by all the ranking methods to all PTMs. We also provide accuracy of each model after fine-tuning. A more interpretable and visual analysis of these scores are provided in section 4.1 of the main paper.

We provide these raw scores here to help aid reproducibility and to help other researchers for easier benchmarking. It is important to note that getting these results, especially accuracy results, is computationally expensive, which may hinder future progress. For instance, on large DomainNet dataset, it takes 711 GPU days of training to get all ground-truth performance. Therefore, providing these raw scores can significantly help future researchers.

The results are provided in the following tables. Table 4 shows results on PACS and VLCS, Table 5 shows results on Office-Home and TerraIncognita, Table 6 contains results on NICO-Animals and NICO-Vehicles, and Table 7 contains results on DomainNet.

Table 3: Details of our model zoo. The first column corresponds to the numbers we have used for subsequent tables. The rest of the table describes architectures, pre-training datasets, and pre-training algorithms as well as the group and source of each model.

| Number | Architecture    | Dataset                      | Algorithm                           | Group   | Source                           |
|--------|-----------------|------------------------------|-------------------------------------|---------|----------------------------------|
| 1      | ResNet-50       | ImageNet-1K                  | ERM                                 | Group 1 | Paszke et al. [61]               |
| 2      | ResNet-152      | ImageNet-1K                  | ERM                                 | Group 1 | Paszke et al. [61]               |
| 3      | ResNeXt-50      | ImageNet-1K                  | ERM                                 | Group 1 | Paszke et al. [61]               |
| 4      | DenseNet-169    | ImageNet-1K                  | ERM                                 | Group 1 | Paszke et al. [61]               |
| 5      | DenseNet-201    | ImageNet-1K                  | ERM                                 | Group 1 | Paszke et al. [61]               |
| 6      | Inception v1    | ImageNet-1K                  | ERM                                 | Group 1 | Paszke et al. [61]               |
| 7      | Inception v3    | ImageNet-1K                  | ERM                                 | Group 1 | Paszke et al. [61]               |
| 8      | MobileNet v2    | ImageNet-1K                  | ERM                                 | Group 1 | Paszke et al. [61]               |
| 9      | EfficientNet-B2 | ImageNet-1K                  | ERM                                 | Group 1 | Paszke et al. [61]               |
| 10     | EfficientNet-B4 | ImageNet-1K                  | ERM                                 | Group 1 | Paszke et al. [61]               |
| 11     | Swin-T          | ImageNet-1K                  | Swin                                | Group 1 | Liu et al. [50]                  |
| 12     | Swin-B          | ImageNet-1K                  | Swin                                | Group 1 | Liu et al. [50]                  |
| 13     | ResNet-50       | ImageNet-1K                  | Adv. $\ell_2$ ( $\epsilon=0.5$ )    | Group 2 | Salman et al. [68]               |
| 14     | ResNet-50       | ImageNet-1K                  | Adv. $\ell_\infty$ ( $\epsilon=4$ ) | Group 2 | Salman et al. [68]               |
| 15     | ResNet-50       | ImageNet-1K                  | BYOL                                | Group 2 | Ericsson et al. [23]             |
| 16     | ResNet-50       | ImageNet-1K                  | MoCo-v2                             | Group 2 | Ericsson et al. [23]             |
| 17     | ResNet-50       | ImageNet-1K                  | InsDis                              | Group 2 | Ericsson et al. [23]             |
| 18     | ResNet-50       | ImageNet-1K                  | PIRL                                | Group 2 | Ericsson et al. [23]             |
| 19     | ResNet-50       | ImageNet-1K                  | DeepCluster-v2                      | Group 2 | Ericsson et al. [23]             |
| 20     | ResNet-50       | ImageNet-1K                  | PCL-v2                              | Group 2 | Ericsson et al. [23]             |
| 21     | ResNet-50       | ImageNet-1K                  | SeLa-v2                             | Group 2 | Ericsson et al. [23]             |
| 22     | ResNet-50       | ImageNet-1K                  | SwAV                                | Group 2 | Ericsson et al. [23]             |
| 23     | ResNet-18       | ImageNet-1K + YFCC-100M      | Semi-supervised                     | Group 3 | Yalniz et al. [84]               |
| 24     | ResNet-50       | ImageNet-1K + YFCC-100M      | Semi-supervised                     | Group 3 | Yalniz et al. [84]               |
| 25     | ResNeXt-50      | ImageNet-1K + YFCC-100M      | Semi-supervised                     | Group 3 | Yalniz et al. [84]               |
| 26     | ResNeXt-101     | ImageNet-1K + YFCC-100M      | Semi-supervised                     | Group 3 | Yalniz et al. [84]               |
| 27     | ResNet-18       | ImageNet-1K + IG-1B-Targeted | Semi-weakly Supervised              | Group 3 | Yalniz et al. [84]               |
| 28     | ResNet-50       | ImageNet-1K + IG-1B-Targeted | Semi-weakly Supervised              | Group 3 | Yalniz et al. [84]               |
| 29     | ResNeXt-50      | ImageNet-1K + IG-1B-Targeted | Semi-weakly Supervised              | Group 3 | Yalniz et al. [84]               |
| 30     | ResNeXt-101     | ImageNet-1K + IG-1B-Targeted | Semi-weakly Supervised              | Group 3 | Yalniz et al. [84]               |
| 31     | Swin-B          | ImageNet-1K + ImageNet-22K   | Swin                                | Group 3 | Liu et al. [50]                  |
| 32     | BEiT-B          | ImageNet-1K + ImageNet-22K   | BEiT                                | Group 3 | Wolf et al. [79], Bao et al. [7] |
| 33     | ViT-B/16        | ImageNet-1K + ImageNet-22K   | ViT                                 | Group 3 | Wolf et al. [79], Wu et al. [80] |
| 34     | ResNet-50       | WebImageText                 | CLIP                                | Group 3 | Radford et al. [64]              |
| 35     | ViT-B/16        | WebImageText                 | CLIP                                | Group 3 | Radford et al. [64]              |

Table 4: The ranking scores and fine-tuning accuracy on PACS and VLCS datasets. The numbering in the first column corresponds to a pre-trained model from Table 3. The numbers in each subsequent column represent the scores assigned by a ranking metric to the PTMs. The last column displays the accuracy of each model after fine-tuning. Empty cells represent models for which ranking is not feasible.

| Model Number | PACS   |        |         |        |        |        |      | VLCS   |        |         |        |        |        |      |
|--------------|--------|--------|---------|--------|--------|--------|------|--------|--------|---------|--------|--------|--------|------|
|              | LEEP   | NCE    | H-Score | kNN    | LogME  | ZooD   | Acc. | LEEP   | NCE    | H-Score | kNN    | LogME  | ZooD   | Acc. |
| 1            | -1.226 | -1.077 | 5.016   | 49.608 | 0.226  | 0.053  | 66.9 | -0.566 | -0.498 | 3.241   | 58.156 | 0.223  | 0.119  | 76.7 |
| 2            | -1.140 | -1.007 | 5.072   | 54.767 | 0.274  | 0.100  | 74.4 | -0.538 | -0.494 | 3.253   | 61.215 | 0.229  | 0.127  | 77.0 |
| 3            | -1.185 | -1.022 | 5.010   | 50.737 | 0.231  | 0.064  | 65.6 | -0.552 | -0.499 | 3.216   | 58.540 | 0.200  | 0.083  | 76.9 |
| 4            | -1.156 | -0.998 | 4.636   | 43.284 | 0.186  | -0.012 | 67.1 | -0.569 | -0.514 | 3.013   | 56.056 | 0.181  | 0.063  | 76.8 |
| 5            | -1.172 | -1.039 | 4.854   | 48.861 | 0.235  | 0.058  | 72.4 | -0.581 | -0.517 | 3.076   | 57.387 | 0.193  | 0.076  | 78.0 |
| 6            | -1.392 | -1.093 | 4.356   | 48.446 | 0.145  | -0.025 | 65.3 | -0.745 | -0.549 | 2.811   | 58.260 | 0.136  | 0.004  | 74.6 |
| 7            | -1.082 | -0.947 | 4.795   | 37.655 | 0.164  | -0.022 | 65.3 | -0.565 | -0.543 | 3.130   | 44.151 | 0.144  | 0.018  | 73.9 |
| 8            | -1.209 | -1.059 | 4.614   | 39.574 | 0.180  | -0.002 | 65.0 | -0.579 | -0.512 | 2.922   | 59.465 | 0.152  | 0.030  | 75.9 |
| 9            | -1.239 | -0.949 | 4.857   | 46.069 | 0.270  | 0.067  | 74.2 | -0.682 | -0.505 | 3.002   | 58.049 | 0.131  | -0.027 | 74.7 |
| 10           | -0.993 | -0.840 | 5.174   | 35.581 | 0.353  | 0.117  | 75.3 | -0.556 | -0.511 | 3.142   | 54.788 | 0.175  | 0.041  | 74.4 |
| 11           | -1.231 | -1.004 | 4.624   | 30.913 | 0.272  | 0.076  | 68.2 | -0.637 | -0.493 | 2.935   | 34.481 | 0.181  | 0.035  | 76.4 |
| 12           | -1.154 | -0.929 | 4.850   | 30.591 | 0.303  | 0.064  | 69.3 | -0.601 | -0.500 | 3.081   | 38.755 | 0.184  | 0.057  | 75.6 |
| 13           | -1.230 | -1.054 | 5.124   | 52.974 | 0.284  | 0.076  | 70.2 | -0.584 | -0.498 | 3.200   | 60.767 | 0.199  | 0.073  | 76.6 |
| 14           | -1.226 | -0.978 | 5.186   | 53.150 | 0.301  | 0.092  | 72.2 | -0.667 | -0.530 | 3.083   | 63.175 | 0.145  | 0.005  | 74.9 |
| 15           |        |        | 5.076   | 46.615 | 0.298  | 0.110  | 74.2 |        |        | 3.208   | 55.076 | 0.200  | 0.081  | 75.6 |
| 16           |        |        | 4.847   | 47.360 | 0.198  | -0.075 | 58.9 |        |        | 3.260   | 60.138 | 0.247  | 0.141  | 69.8 |
| 17           |        |        | 4.578   | 31.131 | 0.066  | -0.319 | 40.9 |        |        | 3.109   | 56.697 | 0.138  | 0.012  | 65.6 |
| 18           |        |        | 4.576   | 28.835 | 0.071  | -0.309 | 38.4 |        |        | 3.150   | 55.033 | 0.162  | 0.043  | 64.2 |
| 19           |        |        | 5.024   | 36.493 | 0.256  | -0.680 | 65.6 |        |        | 3.242   | 49.445 | 0.223  | 0.108  | 76.3 |
| 20           |        |        | 4.760   | 36.451 | 0.151  | -0.093 | 58.4 |        |        | 3.205   | 54.922 | 0.209  | 0.102  | 71.3 |
| 21           |        |        | 4.829   | 35.495 | 0.187  | -0.691 | 64.0 |        |        | 3.258   | 47.359 | 0.230  | -0.435 | 75.4 |
| 22           |        |        | 4.946   | 34.103 | 0.231  | 0.034  | 62.9 |        |        | 3.253   | 52.114 | 0.231  | 0.119  | 77.1 |
| 23           | -1.169 | -0.974 | 4.225   | 48.668 | 0.190  | 0.034  | 69.4 | -0.561 | -0.503 | 2.832   | 57.624 | 0.214  | 0.107  | 77.1 |
| 24           | -1.014 | -0.908 | 5.181   | 57.411 | 0.362  | 0.164  | 75.7 | -0.536 | -0.503 | 3.340   | 58.396 | 0.313  | 0.208  | 78.6 |
| 25           | -1.024 | -0.881 | 5.151   | 55.490 | 0.312  | 0.099  | 74.4 | -0.540 | -0.500 | 3.312   | 62.857 | 0.268  | 0.173  | 77.8 |
| 26           | -0.950 | -0.841 | 5.287   | 61.007 | 0.369  | 0.156  | 78.4 | -0.533 | -0.505 | 3.340   | 63.100 | 0.285  | 0.190  | 77.9 |
| 27           | -1.034 | -0.834 | 4.609   | 63.988 | 0.302  | 0.159  | 83.4 | -0.558 | -0.484 | 2.828   | 58.549 | 0.211  | 0.105  | 77.0 |
| 28           | -0.767 | -0.630 | 5.499   | 75.592 | 0.578  | 0.400  | 91.7 | -0.534 | -0.495 | 3.363   | 61.016 | 0.341  | 0.238  | 79.1 |
| 29           | -0.784 | -0.612 | 5.493   | 78.550 | 0.531  | 0.358  | 89.0 | -0.539 | -0.493 | 3.347   | 62.604 | 0.302  | 0.203  | 78.1 |
| 30           | -0.671 | -0.518 | 5.625   | 74.917 | 0.646  | 0.447  | 91.5 | -0.536 | -0.499 | 3.371   | 66.276 | 0.312  | 0.211  | 78.7 |
| 31           | -1.057 | -0.740 | 5.587   | 41.936 | 0.527  | 0.263  | 85.4 | -0.675 | -0.499 | 3.163   | 39.618 | 0.275  | 0.176  | 78.6 |
| 32           | -1.819 | -1.415 | 3.424   | 26.731 | -0.106 | -0.214 | 47.1 | -1.142 | -0.794 | 2.048   | 52.277 | -0.028 | -0.213 | 68.4 |
| 33           | -1.271 | -0.995 | 4.621   | 58.167 | 0.198  | -0.060 | 66.1 | -0.601 | -0.503 | 3.120   | 68.578 | 0.253  | 0.150  | 78.3 |
| 34           |        |        | 6.188   | 47.724 | 0.075  | -0.106 | 66.0 |        |        | 3.198   | 64.808 | 0.275  | 0.184  | 74.9 |
| 35           |        |        | 5.546   | 84.858 | 0.869  | 0.653  | 96.0 |        |        | 3.143   | 67.367 | 0.377  | 0.312  | 79.5 |

## B Model Ranking in ZooD

In this section, we present more details about the proposed ranking metric and algorithm.

### B.1 Preliminaries: setup, problem and strategy

Suppose that:

- **Model zoo.** We have a collection of PTMs as learned feature extractors:

$$\mathcal{M} = \{\phi_1(x), \phi_2(x), \dots, \phi_k(x), \dots\},$$

where  $\phi_k(x)$  is a  $d$ -dimensional feature extractor that maps  $\mathcal{X}$  to  $\mathbb{R}^d$ .

- **Dataset.** A multi-domain dataset is collected for solving a domain generalization problem:

$$\mathcal{D} = \{\mathcal{D}_1, \mathcal{D}_2, \dots, \mathcal{D}_m\}, \text{ with } \mathcal{D}_i = \{(x_{ij}, y_{ij}), 1 \leq j \leq n_i\},$$

where  $m$  is the number of observed domains and  $\mathcal{D}_i$  is the set of data points under the  $i$ -th domain. The total sample size is  $n = \sum_i n_i$ .

- **Problem.** The objective is to select a PTM  $\phi$  from  $\mathcal{M}$  such that the optimal top classifier  $f$  based on the selected feature extractor  $\phi$ , i.e. the whole predictor is  $f \circ \phi(x)$ , has good prediction performance on the domain generalization task.

To proceed further, we need more notations as follows:

- For any domain  $i$ , we rewrite  $\mathcal{D}_i = \{\mathbf{y}_i, \mathbf{x}_i\}$  where

$$\mathbf{y}_i = (y_{i1}, y_{i2}, \dots, y_{in_i})^\top \in \mathbb{R}^{n_i}, \quad \mathbf{x}_i = (x_{i1}, x_{i2}, \dots, x_{in_i})^\top \in \mathbb{R}^{n_i \times p}.$$

Table 5: The ranking scores and fine-tuning accuracy for Office-Home and TerraIncognita datasets. The numbering in the first column corresponds to a pre-trained model from Table 3. The numbers in each subsequent column represent the scores assigned by a ranking metric to the PTMs. The last column displays the accuracy of each model after fine-tuning. Empty cells represent models for which ranking is not feasible.

| Model Number | Office-Home |        |         |        |       |        |      | TerraIncognita |        |         |        |       |        |      |
|--------------|-------------|--------|---------|--------|-------|--------|------|----------------|--------|---------|--------|-------|--------|------|
|              | LEEP        | NCE    | H-Score | kNN    | LogME | ZooD   | Acc. | LEEP           | NCE    | H-Score | kNN    | LogME | ZooD   | Acc. |
| 1            | -1.540      | -1.311 | 41.908  | 50.614 | 0.985 | 0.075  | 67.7 | -1.531         | -1.286 | 5.559   | 23.477 | 0.301 | -0.722 | 31.0 |
| 2            | -1.355      | -1.198 | 43.973  | 53.499 | 1.029 | 0.120  | 70.6 | -1.501         | -1.338 | 5.592   | 29.018 | 0.305 | -0.721 | 35.2 |
| 3            | -1.465      | -1.263 | 41.439  | 51.501 | 0.979 | 0.076  | 69.1 | -1.519         | -1.290 | 5.491   | 23.227 | 0.292 | -0.735 | 25.5 |
| 4            | -1.457      | -1.280 | 35.695  | 47.413 | 0.941 | 0.025  | 68.7 | -1.473         | -1.266 | 4.850   | 22.977 | 0.244 | -0.815 | 23.9 |
| 5            | -1.460      | -1.271 | 37.727  | 48.186 | 0.952 | 0.036  | 69.1 | -1.573         | -1.321 | 5.119   | 22.116 | 0.251 | -0.831 | 23.0 |
| 6            | -2.243      | -1.701 | 30.175  | 44.089 | 0.887 | -0.015 | 59.0 | -1.636         | -1.327 | 4.432   | 24.368 | 0.238 | -0.881 | 17.7 |
| 7            | -1.396      | -1.327 | 40.696  | 53.520 | 0.977 | 0.083  | 66.2 | -1.440         | -1.286 | 5.097   | 24.285 | 0.250 | -0.819 | 23.8 |
| 8            | -1.713      | -1.439 | 32.911  | 45.934 | 0.902 | -0.005 | 62.8 | -1.614         | -1.373 | 4.782   | 22.793 | 0.264 | -0.811 | 29.7 |
| 9            | -1.628      | -1.143 | 40.378  | 51.252 | 1.022 | 0.106  | 72.2 | -1.610         | -1.388 | 5.124   | 25.737 | 0.299 | -0.740 | 32.8 |
| 10           | -1.229      | -1.082 | 45.309  | 45.939 | 1.094 | 0.176  | 73.6 | -1.523         | -1.383 | 5.517   | 25.909 | 0.319 | -0.720 | 24.8 |
| 11           | -1.528      | -1.174 | 36.781  | 47.708 | 1.018 | 0.100  | 72.5 | -1.563         | -1.393 | 4.474   | 26.624 | 0.272 | -0.746 | 30.3 |
| 12           | -1.320      | -1.099 | 42.086  | 48.265 | 1.070 | 0.139  | 75.9 | -1.545         | -1.466 | 4.984   | 25.561 | 0.289 | -0.720 | 30.9 |
| 13           | -1.594      | -1.311 | 41.423  | 48.194 | 0.972 | 0.061  | 66.3 | -1.625         | -1.315 | 6.101   | 25.319 | 0.348 | -0.803 | 31.9 |
| 14           | -1.825      | -1.377 | 39.631  | 43.415 | 0.937 | 0.027  | 62.4 | -1.704         | -1.309 | 6.106   | 24.481 | 0.344 | -0.910 | 26.7 |
| 15           |             |        | 40.498  | 37.124 | 0.971 | -0.022 | 60.6 |                |        | 5.542   | 24.565 | 0.307 | -0.721 | 23.7 |
| 16           |             |        | 38.633  | 32.130 | 0.941 | -0.102 | 41.6 |                |        | 5.601   | 26.435 | 0.308 | -0.742 | 19.1 |
| 17           |             |        | 31.841  | 18.154 | 0.825 | -0.399 | 22.7 |                |        | 5.675   | 27.931 | 0.308 | -1.067 | 16.0 |
| 18           |             |        | 32.493  | 19.447 | 0.838 | -0.366 | 24.4 |                |        | 5.711   | 30.123 | 0.313 | -0.777 | 18.4 |
| 19           |             |        | 39.876  | 30.521 | 0.956 | -0.010 | 61.0 |                |        | 5.649   | 26.656 | 0.322 | -0.710 | 28.7 |
| 20           |             |        | 36.612  | 27.949 | 0.912 | -0.100 | 44.1 |                |        | 5.486   | 23.898 | 0.296 | -0.775 | 16.1 |
| 21           |             |        | 38.936  | 29.547 | 0.950 | -0.424 | 52.7 |                |        | 5.537   | 23.617 | 0.303 | -0.745 | 23.6 |
| 22           |             |        | 39.705  | 28.988 | 0.954 | -0.041 | 58.8 |                |        | 5.680   | 26.854 | 0.323 | -0.994 | 23.2 |
| 23           | -1.680      | -1.400 | 26.787  | 45.371 | 0.895 | -0.028 | 62.3 | -1.560         | -1.311 | 3.817   | 23.495 | 0.228 | -0.846 | 26.5 |
| 24           | -1.339      | -1.194 | 44.073  | 49.205 | 1.049 | 0.097  | 71.2 | -1.487         | -1.322 | 5.527   | 25.801 | 0.309 | -0.698 | 32.5 |
| 25           | -1.294      | -1.156 | 44.683  | 56.220 | 1.055 | 0.151  | 72.7 | -1.505         | -1.335 | 5.439   | 24.983 | 0.291 | -0.718 | 27.7 |
| 26           | -1.168      | -1.081 | 46.671  | 60.344 | 1.106 | 0.199  | 74.8 | -1.487         | -1.360 | 5.510   | 26.461 | 0.302 | -0.685 | 28.8 |
| 27           | -1.502      | -1.266 | 28.820  | 49.142 | 0.924 | 0.004  | 66.7 | -1.549         | -1.291 | 3.761   | 23.208 | 0.223 | -0.856 | 26.3 |
| 28           | -1.152      | -1.024 | 46.552  | 56.192 | 1.119 | 0.167  | 76.1 | -1.495         | -1.354 | 5.428   | 25.008 | 0.298 | -0.739 | 36.0 |
| 29           | -1.111      | -0.979 | 47.382  | 61.253 | 1.133 | 0.230  | 78.0 | -1.515         | -1.360 | 5.342   | 26.525 | 0.277 | -0.730 | 34.4 |
| 30           | -0.971      | -0.875 | 50.223  | 67.685 | 1.226 | 0.312  | 81.0 | -1.449         | -1.343 | 5.478   | 28.274 | 0.298 | -0.681 | 35.4 |
| 31           | -1.252      | -0.859 | 47.500  | 60.458 | 1.240 | 0.306  | 84.6 | -1.579         | -1.392 | 4.934   | 29.336 | 0.303 | -0.669 | 37.3 |
| 32           | -3.896      | -2.913 | 15.908  | 9.459  | 0.755 | -0.178 | 31.9 | -1.828         | -1.400 | 19.076  | 24.408 | 0.230 | -0.939 | 26.2 |
| 33           | -1.675      | -1.295 | 37.045  | 58.928 | 1.027 | 0.107  | 71.8 | -1.548         | -1.268 | -0.153  | 26.017 | 0.247 | -0.827 | 21.3 |
| 34           |             |        | 26.080  | 22.301 | 0.828 | -0.091 | 42.4 |                |        | 3.695   | 28.290 | 0.220 | -0.868 | 18.8 |
| 35           |             |        | 36.712  | 65.789 | 1.056 | 0.148  | 82.2 |                |        | 4.147   | 31.467 | 0.259 | -0.749 | 40.0 |

- Given a feature extractor  $\phi$ , the learned feature matrix is denoted by

$$\Phi_i = (\phi(x_{i1}), \phi(x_{i2}), \dots, \phi(x_{in_i}))^\top \in \mathbb{R}^{n_i \times d}.$$

- For any  $i \in [m]$ , we denote  $\Phi_{-i}$  and  $\mathbf{y}_{-i}$  as

$$\begin{aligned} \mathbf{y}_{-i} &= (\mathbf{y}_1^\top, \dots, \mathbf{y}_{i-1}^\top, \mathbf{y}_{i+1}^\top, \dots, \mathbf{y}_m^\top)^\top \in \mathbb{R}^{(n-n_i)}, \\ \Phi_{-i} &= (\Phi_1^\top, \dots, \Phi_{i-1}^\top, \Phi_{i+1}^\top, \dots, \Phi_m^\top)^\top \in \mathbb{R}^{(n-n_i) \times d}. \end{aligned}$$

We can break the model selection problem down into two questions. 1). When generalizing to unknown domains, are the learned features stable enough to avoid extrapolating predictions? 2). Are the learned features informative enough to ensure that the correlation between features and labels is stable across different domains? To answer these two questions, we compute the following two quantities:

- $p(\Phi_i | \Phi_{-i})$ , which measures covariate shift between  $\Phi_i$  and  $\Phi_{-i}$ , indicating whether the validation input is a rare sample compared with the training input;
- $p(\mathbf{y}_i | \Phi_i, \mathbf{y}_{-i}, \Phi_{-i})$ , which measures the discriminability and correlation shift between  $\Phi_i$  and  $\mathbf{y}_i$  given the training data  $\Phi_{-i}$  and  $\mathbf{y}_{-i}$ .

We thus propose a metric by assembling the above quantities for PTMs ranking:

$$\log p(\mathbf{y}_i | \Phi_i, \mathbf{y}_{-i}, \Phi_{-i}) + \lambda \log p(\Phi_i | \Phi_{-i}), \quad (6)$$

where  $\lambda$  is a tuning parameter that unifies the scale of the correlation shift and the covariate shift. In our implementation, the tuning parameter is taken to be the ratio of two standard deviations:

$$\lambda = \frac{\text{Std}(\log p(y_{ij} | \Phi_i, \mathbf{y}_{-i}, \Phi_{-i}))}{\text{Std}(\log p(\phi(x_{ij}) | \Phi_{-i}))},$$

which is also used in Ye et al. [87].

Table 6: The ranking scores and fine-tuning accuracy for NICO dataset. The numbering in the first column corresponds to a pre-trained model from Table 3. The numbers in each subsequent column represent the scores assigned by a ranking metric to the PTMs. The last column displays the accuracy of each model after fine-tuning. Empty cells represent models for which ranking is not feasible.

| Model Number | NICO-Animal |        |         |        |       |        |      | NICO-Vehicle |        |         |        |       |        |      |
|--------------|-------------|--------|---------|--------|-------|--------|------|--------------|--------|---------|--------|-------|--------|------|
|              | LEEP        | NCE    | H-Score | kNN    | LogME | ZooD   | Acc. | LEEP         | NCE    | H-Score | kNN    | LogME | ZooD   | Acc. |
| 1            | -0.501      | -0.397 | 7.767   | 86.348 | 0.512 | 0.510  | 91.0 | -0.699       | -0.651 | 6.758   | 81.043 | 0.398 | 0.363  | 86.1 |
| 2            | -0.419      | -0.340 | 7.975   | 88.823 | 0.599 | 0.602  | 92.8 | -0.624       | -0.598 | 6.928   | 84.266 | 0.467 | 0.433  | 88.1 |
| 3            | -0.455      | -0.379 | 7.789   | 87.400 | 0.527 | 0.525  | 92.0 | -0.670       | -0.637 | 6.773   | 82.466 | 0.405 | 0.376  | 86.7 |
| 4            | -0.450      | -0.376 | 7.358   | 86.748 | 0.466 | 0.455  | 91.8 | -0.692       | -0.661 | 6.387   | 80.092 | 0.370 | 0.329  | 86.4 |
| 5            | -0.479      | -0.375 | 7.472   | 85.773 | 0.483 | 0.471  | 92.0 | -0.720       | -0.679 | 6.469   | 79.118 | 0.381 | 0.340  | 86.6 |
| 6            | -0.983      | -0.629 | 6.721   | 78.237 | 0.343 | 0.326  | 83.7 | -1.109       | -0.834 | 5.718   | 72.119 | 0.242 | 0.206  | 79.2 |
| 7            | -0.460      | -0.450 | 7.748   | 84.286 | 0.519 | 0.502  | 88.7 | -0.647       | -0.660 | 6.659   | 77.803 | 0.371 | 0.336  | 83.6 |
| 8            | -0.616      | -0.508 | 6.810   | 81.108 | 0.326 | 0.318  | 86.6 | -0.792       | -0.743 | 5.959   | 76.653 | 0.268 | 0.233  | 82.5 |
| 9            | -0.646      | -0.345 | 7.814   | 79.292 | 0.600 | 0.583  | 92.1 | -0.823       | -0.600 | 6.739   | 80.821 | 0.474 | 0.427  | 88.0 |
| 10           | -0.393      | -0.318 | 8.089   | 82.033 | 0.693 | 0.664  | 92.4 | -0.578       | -0.560 | 7.016   | 77.957 | 0.547 | 0.493  | 88.0 |
| 11           | -0.598      | -0.309 | 7.797   | 80.542 | 0.681 | 0.656  | 93.5 | -0.742       | -0.569 | 6.655   | 80.318 | 0.526 | 0.477  | 89.1 |
| 12           | -0.460      | -0.277 | 8.201   | 80.414 | 0.811 | 0.798  | 95.1 | -0.644       | -0.545 | 6.963   | 78.615 | 0.593 | 0.545  | 90.3 |
| 13           | -0.602      | -0.468 | 7.551   | 82.090 | 0.433 | 0.428  | 88.0 | -0.743       | -0.651 | 6.685   | 78.180 | 0.374 | 0.340  | 84.9 |
| 14           | -0.921      | -0.634 | 7.030   | 69.756 | 0.288 | 0.275  | 81.2 | -0.941       | -0.731 | 6.407   | 71.239 | 0.283 | 0.247  | 80.7 |
| 15           |             |        | 7.546   | 71.552 | 0.438 | 0.427  | 86.9 |              |        | 6.644   | 71.200 | 0.362 | 0.326  | 82.9 |
| 16           |             |        | 7.679   | 73.400 | 0.491 | 0.485  | 80.0 |              |        | 6.701   | 67.634 | 0.376 | 0.331  | 74.0 |
| 17           |             |        | 6.562   | 46.842 | 0.188 | 0.166  | 53.2 |              |        | 6.050   | 49.714 | 0.184 | 0.143  | 53.6 |
| 18           |             |        | 6.756   | 48.977 | 0.225 | 0.207  | 55.4 |              |        | 6.184   | 52.048 | 0.221 | 0.176  | 56.0 |
| 19           |             |        | 7.652   | 68.655 | 0.470 | 0.462  | 89.3 |              |        | 6.743   | 69.965 | 0.395 | 0.354  | 83.8 |
| 20           |             |        | 7.491   | 68.446 | 0.429 | 0.419  | 81.1 |              |        | 6.532   | 65.629 | 0.323 | 0.276  | 75.6 |
| 21           |             |        | 7.649   | 60.005 | 0.458 | -0.970 | 84.2 |              |        | 6.681   | 62.967 | 0.370 | -0.704 | 78.3 |
| 22           |             |        | 7.580   | 65.025 | 0.445 | 0.436  | 87.7 |              |        | 6.710   | 66.776 | 0.385 | 0.343  | 82.4 |
| 23           | -0.482      | -0.391 | 6.713   | 84.406 | 0.404 | 0.391  | 90.6 | -0.688       | -0.633 | 5.748   | 77.967 | 0.324 | 0.284  | 85.9 |
| 24           | -0.346      | -0.278 | 8.081   | 89.122 | 0.666 | 0.656  | 94.3 | -0.593       | -0.573 | 7.001   | 83.783 | 0.524 | 0.479  | 89.9 |
| 25           | -0.333      | -0.255 | 8.266   | 88.655 | 0.754 | 0.757  | 95.1 | -0.563       | -0.538 | 7.122   | 86.015 | 0.559 | 0.519  | 90.1 |
| 26           | -0.305      | -0.245 | 8.383   | 89.750 | 0.832 | 0.831  | 95.9 | -0.524       | -0.514 | 7.250   | 87.605 | 0.627 | 0.582  | 91.1 |
| 27           | -0.444      | -0.347 | 6.793   | 81.971 | 0.425 | 0.410  | 91.3 | -0.649       | -0.602 | 5.873   | 78.824 | 0.350 | 0.312  | 86.4 |
| 28           | -0.283      | -0.211 | 8.253   | 89.394 | 0.772 | 0.762  | 95.8 | -0.527       | -0.520 | 7.131   | 85.509 | 0.594 | 0.549  | 91.1 |
| 29           | -0.287      | -0.192 | 8.424   | 93.119 | 0.872 | 0.871  | 96.7 | -0.515       | -0.490 | 7.250   | 88.538 | 0.632 | 0.590  | 91.6 |
| 30           | -0.255      | -0.164 | 8.594   | 90.335 | 1.038 | 1.037  | 97.4 | -0.478       | -0.450 | 7.430   | 89.605 | 0.752 | 0.710  | 92.8 |
| 31           | -0.521      | -0.167 | 8.407   | 84.414 | 1.086 | 1.063  | 97.5 | -0.641       | -0.439 | 7.254   | 90.010 | 0.824 | 0.774  | 94.5 |
| 32           | -1.864      | -1.317 | 4.772   | 35.264 | 0.057 | 0.031  | 62.2 | -1.801       | -1.282 | 4.525   | 41.243 | 0.044 | 0.007  | 64.4 |
| 33           | -0.393      | -0.224 | 8.673   | 93.392 | 0.819 | 0.798  | 94.6 | -0.616       | -0.511 | 6.808   | 89.564 | 0.589 | 0.534  | 90.4 |
| 34           |             |        | 7.429   | 84.647 | 0.472 | 0.465  | 89.4 |              |        | 6.929   | 83.589 | 0.567 | 0.539  | 92.3 |
| 35           |             |        | 8.240   | 95.664 | 0.936 | 0.932  | 97.5 |              |        | 7.206   | 89.449 | 0.832 | 0.805  | 97.3 |

## B.2 Model Assumption

Since the correlation between  $\phi(x)$  and response variables  $y$  may be non-linear, we need to make further assumptions and approximations. Let each  $y$  be independently generated from a unknown distribution:  $p(y|\Phi, f)$ . Assume this distribution is unimodal and the mode is denoted by  $\mu$ , we can take Taylor expansion of log-likelihood at the mode

$$\log p(y|\phi(x), f) \approx \log p(\mu|\phi(x), f) - \frac{1}{2}(y-\mu)^\top \Lambda (y-\mu)$$

where  $\Lambda = -\nabla_y \nabla_y \log p(y|\phi(x), f)|_{y=\mu}$ . The above transformation is the Laplace approximation [51] and the quadratic term implies the rationality of the Gaussian approximation. Similar to You et al. [91], the top model over a learned feature extractor  $\phi$  is approximated with a linear model:

$$y = \mathbf{w}^\top \phi(x) + \epsilon, \quad y \in \mathbb{R}, \mathbf{w} \in \mathbb{R}^d, \epsilon \in \mathbb{R},$$

where  $\epsilon$  is Gaussian noise with variance  $\beta^{-1}$ . We assume the prior distribution of the weights  $\mathbf{w}$  is a zero-mean isotropic Gaussian distribution governed by a hyperparameter  $\alpha$ :

$$\mathbf{w} \sim \mathcal{N}(\mathbf{0}, \alpha^{-1} \mathbb{I}_d) \quad \text{or} \quad p(\mathbf{w}; \alpha) = \left(\frac{\alpha}{2\pi}\right)^{\frac{d}{2}} \exp\left(-\frac{\alpha}{2} \mathbf{w}^\top \mathbf{w}\right)$$

and the conditional distribution of the target variable  $y$  given  $\phi(x)$  is a Gaussian distribution:

$$y|\phi(x), \mathbf{w} \sim \mathcal{N}(\mathbf{w}^\top \phi(x), \beta^{-1}) \quad \text{or} \quad p(y|\phi(x), \mathbf{w}; \beta) = \left(\frac{\beta}{2\pi}\right)^{\frac{1}{2}} \exp\left(-\frac{\beta}{2} (y - \mathbf{w}^\top \phi(x))^2\right).$$

Recall the notations  $\mathbf{y}_i$ ,  $\Phi_i$ ,  $\mathbf{y}_{-i}$  and  $\Phi_{-i}$  in Appendix B.1. Then we have

$$\mathbf{y}_i|\Phi_i, \mathbf{w} \sim \mathcal{N}(\Phi_i \mathbf{w}, \beta^{-1} \mathbb{I}_{n_i}) \quad \text{and} \quad \mathbf{y}_{-i}|\Phi_{-i}, \mathbf{w} \sim \mathcal{N}(\Phi_{-i} \mathbf{w}, \beta^{-1} \mathbb{I}_{n-n_i}).$$

In the next section, we present the details of estimating the two hyperparameters  $\alpha$  and  $\beta$ . Appendix B.4 shows how to compute the conditional density  $p(\mathbf{y}_i|\Phi_i, \mathbf{y}_{-i}, \Phi_{-i})$  and  $p(\Phi_i|\Phi_{-i})$  in the proposed metric (6).

Table 7: The ranking scores and fine-tuning accuracy for DomainNet dataset. The numbering in the first column corresponds to a pre-trained model from Table 3. The numbers in each subsequent column represent the scores assigned by a ranking metric to the PTMs. The last column displays the accuracy of each model after fine-tuning. Empty cells represent models for which ranking is not feasible.

| Model Number | DomainNet |        |         |        |       |       |      |
|--------------|-----------|--------|---------|--------|-------|-------|------|
|              | LEEP      | NCE    | H-Score | kNN    | LogME | ZooD  | Acc. |
| 1            | -4.083    | -3.972 | 51.822  | 24.387 | 1.590 | 1.229 | 31.1 |
| 2            | -3.946    | -3.898 | 58.350  | 26.811 | 1.601 | 1.237 | 32.6 |
| 3            | -4.033    | -3.963 | 50.728  | 24.933 | 1.588 | 1.228 | 31.3 |
| 4            | -3.984    | -3.943 | 45.158  | 23.998 | 1.566 | 1.204 | 32.2 |
| 5            | -3.989    | -3.931 | 48.664  | 25.178 | 1.569 | 1.207 | 33.5 |
| 6            | -4.646    | -4.287 | 31.525  | 19.208 | 1.560 | 1.211 | 24.2 |
| 7            | -3.999    | -3.981 | 49.943  | 23.852 | 1.588 | 1.238 | 30.3 |
| 8            | -4.172    | -4.059 | 32.807  | 21.075 | 1.561 | 1.208 | 27.9 |
| 9            | -4.177    | -3.833 | 47.122  | 25.990 | 1.584 | 1.225 | 34.2 |
| 10           | -3.768    | -3.694 | 58.857  | 25.956 | 1.603 | 1.250 | 34.7 |
| 11           | -4.063    | -3.829 | 46.212  | 24.848 | 1.586 | 1.231 | 35.3 |
| 12           | -3.914    | -3.769 | 56.918  | 26.283 | 1.602 | 1.240 | 37.4 |
| 13           | -4.127    | -3.965 | 50.865  | 24.040 | 1.588 | 1.225 | 31.8 |
| 14           | -4.252    | -4.037 | 48.624  | 21.554 | 1.584 | 1.224 | 30.8 |
| 15           |           |        | 52.079  | 20.940 | 1.591 | 1.211 | 27.1 |
| 16           |           |        | 54.303  | 17.481 | 1.597 | 1.179 | 12.7 |
| 17           |           |        | 30.438  | 8.729  | 1.556 | 1.113 | 4.1  |
| 18           |           |        | 33.129  | 9.266  | 1.560 | 1.117 | 4.5  |
| 19           |           |        | 47.827  | 17.507 | 1.584 | 1.200 | 25.4 |
| 20           |           |        | 48.762  | 16.188 | 1.587 | 1.174 | 15.1 |
| 21           |           |        | 51.271  | 15.744 | 1.591 | 1.191 | 18.5 |
| 22           |           |        | 47.734  | 16.392 | 1.583 | 1.203 | 23.1 |
| 23           | -4.078    | -3.992 | 28.905  | 22.296 | 1.558 | 1.198 | 29.7 |
| 24           | -3.787    | -3.793 | 64.463  | 27.011 | 1.613 | 1.233 | 38.3 |
| 25           | -3.788    | -3.743 | 64.207  | 28.979 | 1.614 | 1.250 | 35.7 |
| 26           | -3.661    | -3.685 | 70.961  | 30.872 | 1.626 | 1.260 | 38.1 |
| 27           | -3.841    | -3.748 | 35.255  | 27.955 | 1.569 | 1.215 | 35.9 |
| 28           | -3.426    | -3.430 | 82.151  | 35.589 | 1.648 | 1.282 | 46.3 |
| 29           | -3.413    | -3.380 | 83.818  | 38.643 | 1.654 | 1.300 | 44.7 |
| 30           | -3.229    | -3.224 | 98.610  | 42.285 | 1.687 | 1.328 | 48.2 |
| 31           | -3.646    | -3.376 | 73.872  | 35.363 | 1.635 | 1.277 | 48.8 |
| 32           | -5.639    | -5.096 | 14.577  | 5.968  | 1.536 | 1.178 | 10.6 |
| 33           | -4.226    | -3.908 | 50.099  | 27.670 | 1.593 | 1.232 | 34.1 |
| 34           |           |        | 43.703  | 16.713 | 1.565 | 1.201 | 15.9 |
| 35           |           |        | 54.259  | 49.147 | 1.601 | 1.259 | 56.2 |

### B.3 Parameter Estimation

If we introduce a uniform prior distribution over  $\alpha$  and  $\beta$ , the posterior distribution for  $\alpha$  and  $\beta$  is

$$p(\alpha, \beta | \mathbf{y}_{-i}, \Phi_{-i}) = \frac{p(\alpha, \beta, \mathbf{y}_{-i}, \Phi_{-i})}{p(\mathbf{y}_{-i}, \Phi_{-i})} \propto p(\alpha, \beta, \mathbf{y}_{-i}, \Phi_{-i}) = p(\mathbf{y}_{-i}, \Phi_{-i} | \alpha, \beta) p(\alpha, \beta),$$

where the prior distribution  $p(\alpha, \beta)$  is assumed to be a uniform distribution over  $\alpha$  and  $\beta$ . Then the values of  $\hat{\alpha}$  and  $\hat{\beta}$  are obtained by maximizing the density function  $p(\mathbf{y}_{-i}, \Phi_{-i} | \alpha, \beta)$ , which is also the model evidence over  $\{\mathbf{y}_{-i}, \Phi_{-i}\}$ . The density function  $p(\mathbf{y}_{-i}, \Phi_{-i} | \alpha, \beta)$  is obtained by integrating over  $\mathbf{w}$ :

$$\begin{aligned} p(\mathbf{y}_{-i}, \Phi_{-i} | \alpha, \beta) &= \int_{\mathbf{w}} p(\mathbf{y}_{-i}, \Phi_{-i} | \mathbf{w}, \beta) p(\mathbf{w} | \alpha) d\mathbf{w} \\ &= \int_{\mathbf{w}} p(\mathbf{y}_{-i} | \Phi_{-i}, \mathbf{w}, \beta) p(\Phi_{-i} | \mathbf{w}, \beta) p(\mathbf{w} | \alpha) d\mathbf{w} \\ &= \int_{\mathbf{w}} p(\mathbf{y}_{-i} | \Phi_{-i}, \mathbf{w}, \beta) p(\mathbf{w} | \alpha) d\mathbf{w} \times p(\Phi_{-i}) \\ &\propto \int_{\mathbf{w}} p(\mathbf{y}_{-i} | \Phi_{-i}, \mathbf{w}, \beta) p(\mathbf{w} | \alpha) d\mathbf{w}. \end{aligned}$$

According to the model assumptions in Appendix B.2:

$$\mathbf{y}_{-i} | \Phi_{-i}, \mathbf{w} \sim \mathcal{N}(\Phi_{-i} \mathbf{w}, \beta^{-1} \mathbb{I}_{n-n_i}) \quad \text{and} \quad \mathbf{w} \sim \mathcal{N}(\mathbf{0}, \alpha^{-1} \mathbb{I}_d),$$

then the likelihood function of  $\alpha$  and  $\beta$  is

$$\begin{aligned}
L(\alpha, \beta) &= \int_{\mathbf{w}} p(\mathbf{y}_{-i} | \Phi_{-i}, \mathbf{w}, \beta) p(\mathbf{w} | \alpha) d\mathbf{w} \\
&= \left(\frac{\beta}{2\pi}\right)^{\frac{n-n_i}{2}} \left(\frac{\alpha}{2\pi}\right)^{\frac{d}{2}} \int_{\mathbf{w}} \exp\left(-\frac{\beta}{2}(\mathbf{y}_{-i} - \Phi_{-i}\mathbf{w})^\top(\mathbf{y}_{-i} - \Phi_{-i}\mathbf{w}) - \frac{\alpha}{2}\mathbf{w}^\top\mathbf{w}\right) d\mathbf{w} \\
&= \left(\frac{\beta}{2\pi}\right)^{\frac{n-n_i}{2}} \left(\frac{\alpha}{2\pi}\right)^{\frac{d}{2}} \int_{\mathbf{w}} \exp(-E(\mathbf{w})) d\mathbf{w},
\end{aligned}$$

where  $E(\mathbf{w})$  is the energy function of  $\mathbf{w}$ , i.e.

$$E(\mathbf{w}) = \frac{\beta}{2}(\mathbf{y}_{-i} - \Phi_{-i}\mathbf{w})^\top(\mathbf{y}_{-i} - \Phi_{-i}\mathbf{w}) + \frac{\alpha}{2}\mathbf{w}^\top\mathbf{w}.$$

Given  $\mathbf{y}_{-i}$  and  $\Phi_{-i}$ , then the posterior distribution of  $\mathbf{w}$  is

$$p(\mathbf{w} | \mathbf{y}_{-i}, \Phi_{-i}, \alpha, \beta) \sim \mathcal{N}(\mathbf{w} | \mathbf{m}_{-i}, \mathbf{A}_{-i}^{-1}),$$

where

$$\mathbf{m}_{-i} = \beta \mathbf{A}_{-i}^{-1} \Phi_{-i}^\top \mathbf{y}_{-i}, \quad \mathbf{A}_{-i} = \alpha \mathbb{I}_d + \beta \Phi_{-i}^\top \Phi_{-i}.$$

Notice that

$$\begin{aligned}
E(\mathbf{w}) &= \frac{\beta}{2}\mathbf{w}^\top \Phi_{-i}^\top \Phi_{-i} \mathbf{w} + \frac{\alpha}{2}\mathbf{w}^\top\mathbf{w} - \beta\mathbf{y}_{-i}^\top \Phi_{-i} \mathbf{w} + \frac{\beta}{2}\mathbf{y}_{-i}^\top \mathbf{y}_{-i} \\
&= \frac{1}{2}\mathbf{w}^\top (\beta \Phi_{-i}^\top \Phi_{-i} + \alpha \mathbb{I}_d) \mathbf{w} - \beta\mathbf{y}_{-i}^\top \Phi_{-i} \mathbf{w} + \frac{\beta}{2}\mathbf{y}_{-i}^\top \mathbf{y}_{-i} \\
&= \frac{1}{2}\mathbf{w}^\top \mathbf{A}_{-i} \mathbf{w} - \beta\mathbf{y}_{-i}^\top \Phi_{-i} \mathbf{A}_{-i}^{-1} \mathbf{A}_{-i} \mathbf{w} + \frac{\beta}{2}\mathbf{y}_{-i}^\top \mathbf{y}_{-i} \\
&= \frac{1}{2}\mathbf{w}^\top \mathbf{A}_{-i} \mathbf{w} - \mathbf{m}_{-i}^\top \mathbf{A}_{-i} \mathbf{w} + \frac{\beta}{2}\mathbf{y}_{-i}^\top \mathbf{y}_{-i}.
\end{aligned}$$

Then we have  $E(\mathbf{m}_{-i}) = -\frac{1}{2}\mathbf{m}_{-i}^\top \mathbf{A}_{-i} \mathbf{m}_{-i} + \frac{\beta}{2}\mathbf{y}_{-i}^\top \mathbf{y}_{-i}$ . We rewrite  $\mathbf{w} = \mathbf{w} - \mathbf{m}_{-i} + \mathbf{m}_{-i}$  and obtain that

$$\frac{1}{2}\mathbf{w}^\top \mathbf{A}_{-i} \mathbf{w} = \frac{1}{2}(\mathbf{w} - \mathbf{m}_{-i})^\top \mathbf{A}_{-i} (\mathbf{w} - \mathbf{m}_{-i}) - \frac{1}{2}\mathbf{m}_{-i}^\top \mathbf{A}_{-i} \mathbf{m}_{-i} + \mathbf{m}_{-i}^\top \mathbf{A}_{-i} \mathbf{w}.$$

Therefore,

$$\begin{aligned}
E(\mathbf{w}) &= \frac{1}{2}(\mathbf{w} - \mathbf{m}_{-i})^\top \mathbf{A}_{-i} (\mathbf{w} - \mathbf{m}_{-i}) - \frac{1}{2}\mathbf{m}_{-i}^\top \mathbf{A}_{-i} \mathbf{m}_{-i} + \frac{\beta}{2}\mathbf{y}_{-i}^\top \mathbf{y}_{-i} \\
&= E(\mathbf{m}_{-i}) + \frac{1}{2}(\mathbf{w} - \mathbf{m}_{-i})^\top \mathbf{A}_{-i} (\mathbf{w} - \mathbf{m}_{-i}).
\end{aligned}$$

Then we have

$$\begin{aligned}
\log L(\alpha, \beta) &= \frac{n-n_i}{2} \log \beta + \frac{d}{2} \log \alpha - \frac{n-n_i}{2} \log(2\pi) - E(\mathbf{m}_{-i}) - \frac{1}{2} \log |\mathbf{A}_{-i}| \\
&= \frac{n-n_i}{2} \log \beta + \frac{d}{2} \log \alpha - \frac{n-n_i}{2} \log(2\pi) - \frac{\beta}{2} \|\mathbf{y}_{-i} - \Phi_{-i} \mathbf{m}_{-i}\|^2 - \frac{\alpha}{2} \|\mathbf{m}_{-i}\|^2 - \frac{1}{2} \log |\mathbf{A}_{-i}|.
\end{aligned} \tag{7}$$

and obtain  $\hat{\alpha}$  and  $\hat{\beta}$  by maximizing  $\log L(\alpha, \beta)$ , i.e.,

$$\hat{\alpha}, \hat{\beta} = \operatorname{argmax}_{\alpha, \beta} \log L(\alpha, \beta).$$

We can find that the objective function here is the same as Eq.(2) in You et al. [91]. Then we use the fix-point iteration algorithm [91, 90]. The detailed inference procedure is presented as follows.

Let  $\lambda_i$  and  $\mathbf{v}_i$  be the  $i$ -th eigenvalue and eigenvector of the matrix  $\beta \Phi_{-i}^\top \Phi_{-i}$ . That is  $(\beta \Phi_{-i}^\top \Phi_{-i}) \mathbf{v}_i = \lambda_i \mathbf{v}_i$ . Then we have

$$|\mathbf{A}_{-i}| = |\alpha \mathbb{I}_d + \beta \Phi_{-i}^\top \Phi_{-i}| = \prod_{i=1}^d (\alpha + \lambda_i).$$

The stationary points of  $\log L(\alpha, \beta)$  with respect to  $\alpha$  satisfy

$$\begin{aligned} \frac{d}{2\alpha} - \frac{1}{2} \|\mathbf{w}\|^2 - \frac{1}{2} \frac{d}{d\alpha} \log \left( \prod_{i=1}^d (\alpha + \lambda_i) \right) &= 0 \\ \Leftrightarrow d - \sum_{i=1}^d \frac{\alpha}{\alpha + \lambda_i} &= \alpha \|\mathbf{w}\|^2 \\ \Leftrightarrow \alpha &= \frac{\gamma}{\|\mathbf{w}\|^2} \quad \text{with} \quad \gamma = \sum_{i=1}^d \frac{\lambda_i}{\alpha + \lambda_i}. \end{aligned}$$

Notice that the eigenvalues  $\lambda_i$  are proportional to  $\beta$ . Hence  $d\lambda_i/d\beta = \lambda_i/\beta$ . Then the stationary points of  $\log L(\alpha, \beta)$  with respect to  $\beta$  satisfy

$$\begin{aligned} \frac{n-n_i}{2\beta} - \frac{1}{2} \|\mathbf{y}_{-i} - \Phi_{-i} \mathbf{m}_{-i}\|^2 - \frac{1}{2\beta} \sum_{i=1}^d \frac{\lambda_i}{\alpha + \lambda_i} &= 0 \\ \Leftrightarrow \frac{1}{\beta} &= \frac{1}{n-n_i-\gamma} \|\mathbf{y}_{-i} - \Phi_{-i} \mathbf{m}_{-i}\|^2. \end{aligned}$$

#### B.4 Computing Metric

In this section, we present the details of computing the covariate shift  $p(\Phi_i | \Phi_{-i})$  and the correlation shift  $p(\mathbf{y}_i | \Phi_i, \mathbf{y}_{-i}, \Phi_{-i})$ . Then we can plug these two quantities into (6) to compute the proposed metric.

**Covariate shift.** Leaving the  $i$ -th domain out, we compute the density  $p(\Phi_i | \Phi_{-i})$  to check whether the learned feature  $\phi(x)$  is stable such that the distribution shift between  $\Phi_i$  and  $\Phi_{-i}$  is not significant. We approximate the distribution of  $\phi(x)$  with a Gaussian distribution  $\mathcal{N}(\mu_\phi, \Sigma_\phi)$  and empirically estimate the parameters  $\mu_\phi$  and  $\Sigma_\phi$  from the training inputs  $\Phi_{-i} \in \mathbb{R}^{(n-n_i) \times d}$ . That is,

$$\hat{\mu}_\phi = \frac{1}{n-n_i} \Phi_{-i}^\top \mathbb{1}_{n-n_i}, \quad \hat{\Sigma}_\phi = \frac{1}{n-n_i} (\Phi_{-i} - \mathbb{1}_{n-n_i} \hat{\mu}_\phi^\top)^\top (\Phi_{-i} - \mathbb{1}_{n-n_i} \hat{\mu}_\phi^\top),$$

where  $\mathbb{1}_{n-n_i}$  is a  $(n-n_i)$ -length one vector. Then we compute the density of  $\Phi_i$  according to  $\mathcal{N}(\hat{\mu}_\phi, \hat{\Sigma}_\phi)$ :

$$\begin{aligned} p(\Phi_i | \Phi_{-i}) &= p(\Phi_i | \hat{\mu}_\phi, \hat{\Sigma}_\phi) = \prod_{j=1}^{n_i} \sqrt{\frac{1}{(2\pi)^d |\hat{\Sigma}_\phi|}} \exp \left( -\frac{1}{2} (\phi(x_{ij}) - \hat{\mu}_\phi)^\top \hat{\Sigma}_\phi^{-1} (\phi(x_{ij}) - \hat{\mu}_\phi) \right). \\ &= (2\pi)^{-\frac{n_i d}{2}} |\hat{\Sigma}_\phi|^{-\frac{n_i}{2}} \exp \left( -\frac{1}{2} \text{trace} \left\{ (\Phi_i - \mathbb{1}_{n_i} \hat{\mu}_\phi^\top) \hat{\Sigma}_\phi^{-1} (\Phi_i - \mathbb{1}_{n_i} \hat{\mu}_\phi^\top)^\top \right\} \right). \end{aligned}$$

**Correlation shift.** Given  $\hat{\alpha}$  and  $\hat{\beta}$ , we have

$$p(\mathbf{y}_i | \Phi_i, \mathbf{y}_{-i}, \Phi_{-i}; \hat{\alpha}, \hat{\beta}) = \frac{p(\mathbf{y}_i, \mathbf{y}_{-i} | \Phi_i, \Phi_{-i}; \hat{\alpha}, \hat{\beta})}{p(\mathbf{y}_{-i} | \Phi_i, \Phi_{-i}; \hat{\alpha}, \hat{\beta})} = \frac{p(\mathbf{y}_i, \mathbf{y}_{-i} | \Phi_i, \Phi_{-i}; \hat{\alpha}, \hat{\beta})}{p(\mathbf{y}_{-i} | \Phi_{-i}; \hat{\alpha}, \hat{\beta})}. \quad (8)$$

We write  $\hat{\mathbf{m}}_{-i} = \hat{\beta} \hat{\mathbf{A}}_{-i}^{-1} \Phi_{-i}^\top \mathbf{y}_{-i}$  and  $\hat{\mathbf{A}}_{-i} = \hat{\alpha} \mathbb{I}_d + \hat{\beta} \Phi_{-i}^\top \Phi_{-i}$ . According to (7),

$$\begin{aligned} \log p(\mathbf{y}_{-i} | \Phi_{-i}; \hat{\alpha}, \hat{\beta}) &= \frac{n-n_i}{2} \log \hat{\beta} + \frac{d}{2} \log \hat{\alpha} - \frac{n-n_i}{2} \log(2\pi) \\ &\quad - \frac{\hat{\beta}}{2} \|\mathbf{y}_{-i} - \Phi_{-i} \hat{\mathbf{m}}_{-i}\|^2 - \frac{\hat{\alpha}}{2} \|\hat{\mathbf{m}}_{-i}\|^2 - \frac{1}{2} \log |\hat{\mathbf{A}}_{-i}|. \end{aligned} \quad (9)$$

To proceed further, we denote

$$\mathbf{y} = (\mathbf{y}_i^\top, \mathbf{y}_{-i}^\top)^\top \in \mathbb{R}^n, \quad \Phi = (\Phi_i^\top, \Phi_{-i}^\top)^\top \in \mathbb{R}^{n \times d}, \quad \hat{\mathbf{m}} = \hat{\beta} \hat{\mathbf{A}}^{-1} \Phi^\top \mathbf{y}, \quad \hat{\mathbf{A}} = \hat{\alpha} \mathbb{I}_d + \hat{\beta} \Phi^\top \Phi.$$

Similar to (7), we have

$$\begin{aligned} \log p(\mathbf{y} | \Phi; \hat{\alpha}, \hat{\beta}) &= \log p(\mathbf{y}_i, \mathbf{y}_{-i} | \Phi_i, \Phi_{-i}; \hat{\alpha}, \hat{\beta}) \\ &= \frac{n}{2} \log \hat{\beta} + \frac{d}{2} \log \hat{\alpha} - \frac{n}{2} \log(2\pi) - \frac{\hat{\beta}}{2} \|\mathbf{y} - \Phi \hat{\mathbf{m}}\|^2 - \frac{\hat{\alpha}}{2} \|\hat{\mathbf{m}}\|^2 - \frac{1}{2} \log |\hat{\mathbf{A}}|. \end{aligned} \quad (10)$$

Plugging (9) and (10) into (6), we obtain the value of the proposed metric.

**Remark.** Given  $\mathbf{y}_{-i}$ ,  $\Phi_{-i}$ ,  $\hat{\alpha}$  and  $\hat{\beta}$ , the posterior distribution of  $\mathbf{w}$  is

$$p(\mathbf{w}|\mathbf{y}_{-i}, \Phi_{-i}, \hat{\alpha}, \hat{\beta}) \sim \mathcal{N}\left(\mathbf{w}|\hat{\mathbf{m}}_{-i}, \hat{\mathbf{A}}_{-i}^{-1}\right).$$

Further,

$$p(\mathbf{y}_i|\Phi_i, \mathbf{y}_{-i}, \Phi_{-i}; \hat{\alpha}, \hat{\beta}) = \int_{\mathbf{w}} p(\mathbf{y}_i|\Phi_i, \mathbf{w}; \hat{\beta}) p(\mathbf{w}|\mathbf{y}_{-i}, \Phi_{-i}; \hat{\alpha}, \hat{\beta}) d\mathbf{w}.$$

By calculating the integral, we can deduce

$$\mathbf{y}_i|\Phi_i, \mathbf{y}_{-i}, \Phi_{-i} \sim \mathcal{N}\left(\Phi_i \hat{\mathbf{m}}_{-i}, \hat{\beta}^{-1} \mathbb{I}_{n_i} + \Phi_i \hat{\mathbf{A}}_{-i}^{-1} \Phi_i^\top\right).$$

Therefore we can also use this distribution to calculate  $p(\mathbf{y}_i|\Phi_i, \mathbf{y}_{-i}, \Phi_{-i})$  directly. Throughout this paper, we use the formula (8) to calculate the correlation shift.

## B.5 Cross-Domain Validation Selects Invariant Features

To justify our proposed selection method, and provide more intuition, we conduct explicit analysis in a linear regression setting. Despite the over-simplification, it does reflect the essence of our approach. From this base case, adaptations to more complicated and realistic assumptions can be made.

**Data Assumption** Suppose we have data in different domains with domain invariant and domain-specific features, with respect to the response variable  $y$ . Denote the set of invariant features to be  $iv$ , which are assumed to be unit-norm and orthogonal to each other. Without loss of generality, let data in domain  $\mathcal{D}$  be  $\mathbf{x} = (\mathbf{x}_{iv}, \mathbf{x}_{\mathcal{D}})$  where  $\mathbf{x}_{iv} \in \mathbb{R}^{d^*}$  denotes the domain invariant features and  $\mathbf{x}_{\mathcal{D}} \in \mathbb{R}^{d-d^*}$  denotes domain specific ones. Let  $\mathbf{x}_{iv}$  be fixed. The domain-specific features can have non-zero correlation with  $\mathbf{x}_{iv}$  such that

$$\mathbf{x}_{\mathcal{D}} = \mathbf{x}_{iv} \cdot \mathbf{A}_{\mathcal{D}} + \mathbf{e}_{\mathcal{D}},$$

where  $\mathbf{A}_{\mathcal{D}} \in \mathbb{R}^{d^* \times (d-d^*)}$ , and  $\mathbf{e}_{\mathcal{D}} \sim N(0, s^2 \mathbf{I}_{d-d^*})$ . For different domains, assume the correlation to be independently random, i.e.,  $\mathbf{A}_{\mathcal{D}}$ 's are i.i.d. matrices with independent entries with mean 0 and variance 1. Given the features  $\mathbf{x}$ , assume the response  $y$  only depends on  $\mathbf{x}_{iv}$  such that

$$y = \mathbf{x}_{iv} \cdot \beta_{iv} + \epsilon = \mathbf{x} \cdot \beta + \epsilon,$$

where  $\beta = (\beta_{iv}, \beta^{\mathcal{D}})$  with  $\beta^{\mathcal{D}} = \mathbf{0}$  and  $\epsilon$  follows  $N(0, \sigma^2)$ .

**Model Assumption** Let the model candidates be linear models fitted to different subsets of the features and there are in total  $2^d$  different combinations. Denote the fitted parameters to be  $\hat{\beta} \in \mathbb{R}^d$  with only the selected dimensions being non-zero. Let the selection be  $\phi$ , which is a subset of  $\{1, \dots, d\}$ . We want to show that our proposed statistics, in the cross-validated fashion, will prefer the optimal one with  $\phi = iv$ . The optimality is in the sense that it achieves the best goodness-of-fit, measured by the square loss.

**More Notations** Let  $(\mathbf{X}, \mathbf{y}), (\tilde{\mathbf{X}}, \tilde{\mathbf{y}})$  be independent datasets in two domains to be cross validated. For any vector (matrix), we use subscript to denote part of it with selected rows (columns). For instance, a model candidates with feature dimensions  $\phi$  will only fit  $\mathbf{y} \sim \mathbf{X}_{\phi}$  and the resulting  $\hat{\beta}$  will only be nonzero on  $\hat{\beta}_{\phi}$ . For a set  $\phi$ , denote  $|\phi|$  to be its cardinality and  $\bar{\phi}$  to be its complement.

In our proposed test statistics, there are two terms to be assessed. The first term is essentially the goodness-of-fit of  $\tilde{\mathbf{y}}$  and  $\tilde{\mathbf{X}}_{\phi} \cdot \hat{\beta}_{\phi}$ , which is of critical importance for selecting the invariance and consistent features across different domains. The second term can be seen as some regularization. In this section, we will focus on the first term, and to make things really simple, we consider expected  $l_2$  loss as the measure for goodness-of-fit.

The estimated  $\hat{\beta}$  can be explicitly written as

$$\hat{\beta}_{\phi} = (\mathbf{X}_{\phi}^\top \mathbf{X}_{\phi})^{-1} \mathbf{X}_{\phi}^\top \mathbf{y} \in \mathbb{R}^{|\phi|}.$$

Given  $\mathbf{y} = \mathbf{X}\beta + \epsilon$ , we can write

$$\mathbf{X}\beta = \mathbf{X}_\phi\beta_\phi + \mathbf{X}_{\bar{\phi}}\beta_{\bar{\phi}}.$$

Thus,

$$\begin{aligned}\hat{\beta}_\phi &= \beta_\phi + (\mathbf{X}_\phi^\top \mathbf{X}_\phi)^{-1} \mathbf{X}_\phi^\top \mathbf{X}_{\bar{\phi}} \beta_{\bar{\phi}} + (\mathbf{X}_\phi^\top \mathbf{X}_\phi)^{-1} \mathbf{X}_\phi^\top \epsilon \\ &= \beta_\phi + (\mathbf{X}_\phi^\top \mathbf{X}_\phi)^{-1} \mathbf{X}_\phi^\top \epsilon.\end{aligned}\tag{11}$$

The expected  $l_2$  loss can be expressed as

$$\begin{aligned}& \mathbb{E}_{\epsilon, \tilde{\epsilon}, e, A, \tilde{e}, \tilde{A}} \left( \|\tilde{\mathbf{y}} - \tilde{\mathbf{X}}_\phi \cdot \hat{\beta}_\phi\|^2 \right) \\ &= \mathbb{E}_{\epsilon, e, A, \tilde{e}, \tilde{A}} \left( \|\tilde{\mathbf{X}} \cdot \beta - \tilde{\mathbf{X}}_\phi \cdot \hat{\beta}_\phi\|^2 \right) + n\sigma^2 \\ &= \mathbb{E}_{\epsilon, e, A, \tilde{e}, \tilde{A}} \left( \|\tilde{\mathbf{X}}_{iv\cap\phi} \beta_{iv\cap\phi} + \tilde{\mathbf{X}}_{iv\setminus\phi} \beta_{iv\setminus\phi} - \tilde{\mathbf{X}}_{\phi\cap iv} \cdot \hat{\beta}_{\phi\cap iv} - \tilde{\mathbf{X}}_{\phi\setminus iv} \cdot \hat{\beta}_{\phi\setminus iv}\|^2 \right) + n\sigma^2 \\ &= \mathbb{E}_{\epsilon, e, A, \tilde{e}, \tilde{A}} \left( \|\tilde{\mathbf{X}}_{iv\cap\phi} (\beta_{iv\cap\phi} - \hat{\beta}_{iv\cap\phi}) + \tilde{\mathbf{X}}_{iv\setminus\phi} \beta_{iv\setminus\phi} - \tilde{\mathbf{X}}_{\phi\setminus iv} \cdot \hat{\beta}_{\phi\setminus iv}\|^2 \right) + n\sigma^2 \\ &= \mathbb{E}_{\epsilon, e, A, \tilde{e}, \tilde{A}} \left( \|\tilde{\mathbf{X}}_{iv\cap\phi} ((\mathbf{X}_\phi^\top \mathbf{X}_\phi)^{-1} \mathbf{X}_\phi^\top \epsilon)_{iv\cap\phi} + \tilde{\mathbf{X}}_{iv\setminus\phi} \beta_{iv\setminus\phi} - \tilde{\mathbf{X}}_{\phi\setminus iv} \cdot \hat{\beta}_{\phi\setminus iv}\|^2 \right) + n\sigma^2 \\ &:= \mathbb{E}_{\epsilon, e, A, \tilde{e}, \tilde{A}} \left( \|I_1 + I_2 + I_3\|^2 \right) + n\sigma^2.\end{aligned}$$

$I_1$  accounts for the variance in estimating the selected invariance features.  $I_2$  is non-random and accounts for the error from unselected invariance features.  $I_3$  accounts the error from wrongly selected features. Easy to verify that  $\mathbb{E}(I_1) = \mathbb{E}(I_3) = 0$  and  $\mathbb{E}(I_1 I_3) = 0$ , since  $\hat{\beta}$  is independent with  $\tilde{A}, \tilde{e}$ , which are both mean zero.

$$\mathbb{E}_{\epsilon, e, A, \tilde{e}, \tilde{A}} (\|I_1\|^2) = \sigma^2 \mathbb{E}_{e, A} \text{tr} \left( (\mathbf{X}_\phi^\top \mathbf{X}_\phi)_{iv\cap\phi}^{-1} \right)$$

For  $I_3$ , we can further write

$$\begin{aligned}\mathbb{E}_{\epsilon, e, A, \tilde{e}, \tilde{A}} (\|I_3\|^2) &= \mathbb{E}_{\epsilon, e, A, \tilde{e}, \tilde{A}} \left( \hat{\beta}_{\phi\setminus iv}^\top \tilde{\mathbf{X}}_{\phi\setminus iv}^\top \tilde{\mathbf{X}}_{\phi\setminus iv} \hat{\beta}_{\phi\setminus iv} \right) \\ &= \mathbb{E}_{\epsilon, e, A} \left( \|\hat{\beta}_{\phi\setminus iv}\|^2 \right) \mathbb{E}_{\tilde{e}, \tilde{A}} \text{tr} \left( \tilde{\mathbf{X}}_{\phi\setminus iv}^\top \tilde{\mathbf{X}}_{\phi\setminus iv} \right) \\ &= \mathbb{E}_{\epsilon, e, A} \left( \|\hat{\beta}_{\phi\setminus iv}\|^2 \right) \left( \mathbb{E}_{\tilde{A}} \text{tr} \left( \tilde{\mathbf{A}}_{\phi\setminus iv}^\top \tilde{\mathbf{A}}_{\phi\setminus iv} \right) + n|\phi\setminus iv|s^2 \right) \\ &= n(1+s^2)|\phi\setminus iv| \cdot \mathbb{E}_{\epsilon, e, A} \left( \|\hat{\beta}_{\phi\setminus iv}\|^2 \right)\end{aligned}$$

Therefore,

$$\begin{aligned}& \mathbb{E}_{\epsilon, \tilde{\epsilon}, e, A, \tilde{e}, \tilde{A}} \left( \|\tilde{\mathbf{y}} - \tilde{\mathbf{X}}_\phi \cdot \hat{\beta}\|^2 \right) \\ &= \sigma^2 \mathbb{E}_{e, A} \text{tr} \left( (\mathbf{X}_\phi^\top \mathbf{X}_\phi)_{iv\cap\phi}^{-1} \right) + \|\beta_{iv\setminus\phi}\|^2 + n(1+s^2)|\phi\setminus iv| \cdot \mathbb{E}_{\epsilon, e, A} \left( \|\hat{\beta}_{\phi\setminus iv}\|^2 \right) + n\sigma^2.\end{aligned}$$

If  $\phi = iv$ , the above quantity is minimized with  $\mathbb{E}_{\epsilon, \tilde{\epsilon}, e, A, \tilde{e}, \tilde{A}} \left( \|\tilde{\mathbf{y}} - \tilde{\mathbf{X}}_\phi \cdot \hat{\beta}\|^2 \right) = (n+d^*)\sigma^2$ .

## C Feature Selection in ZooD

In this section, we present more details about the PTMs ensemble and feature selection in Section 3.2. The top-ranked PTMs in Section 3.1 are preferred for solving the OoD generalization task. To further aggregate different PTMs, we consider assembling the features by using PTMs as feature extractors

$$\Phi = [\Phi^{(1)}, \dots, \Phi^{(k)}],$$

where  $\Phi^{(i)}$  is the  $i$ -th ranked feature extractor and  $[\cdot]$  denotes the row concatenation operation. As we show in experiments, in most cases, using aggregated models can significantly outperform any single model. However, the rough ensemble will inevitably introduce more noise. According to the definition of OoD learnability proposed by Ye et al. [87], non-informative but invariant features from training domains may only bring some noise, and the accumulation of noise hurts learnability of the OoD generalization task. Therefore, we propose a Bayesian feature selection method based on the Gaussian linear framework in Section 3.1.

### C.1 Bayesian Variable Selection

In the Bayesian literature, the variable selection problem can be efficiently solved by introducing, for each variable  $w_i$ , a binary mask  $z_i \in \{0, 1\}$  [48, 16, 83, 86], which are given by Bernoulli distributions governed by probability coefficient  $\pi$ . Let  $\mathbf{z} = \{z_i\}_{i=1}^d$  and

$$p(\mathbf{z}; \pi) = \prod_{i=1}^d p(z_i) = \prod_{i=1}^d \pi_i^{z_i} (1 - \pi_i)^{1 - z_i}.$$

From a generative perspective, these masks determine whether the weight  $w_i$  is generated from a slab or a spike prior [37]. If  $z_i = 1$ , then  $w_i$  will follow a slab prior with diffusing probability density; if  $z_i = 0$ ,  $w_i$  will have a spike prior with probability mass concentrated around 0, and thus should be discarded. Specifically, we assume

$$p(w_i | z_i, \alpha_{i,1}, \alpha_{i,2}) = \begin{cases} \mathcal{N}(0, \alpha_{i,1}^{-1}) & \text{if } z_i = 1; \\ \mathcal{N}(0, \alpha_{i,2}^{-1}) & \text{if } z_i = 0. \end{cases}$$

Denote  $\mathbf{w} = (w_1, \dots, w_d)^\top$  and  $\alpha_{i,1}$  and  $\alpha_{i,2}$  control the shape of the  $w_i$  distribution and should be reasonably large for  $\alpha_{i,2}$ . Conditioned on  $w_i$ , each data point  $y_n$  is assumed to be independently drawn from a linear model with mean  $\mathbf{w}^\top \phi(x)$  and additional Gaussian noise with inverse variance  $\beta$ :

$$p(y_n | \phi(x_n), \mathbf{w}; \beta) = \left(\frac{\beta}{2\pi}\right)^{\frac{1}{2}} \exp\left(-\frac{\beta}{2} (y_n - \mathbf{w}^\top \phi(x_n))^2\right).$$

The model specification is completed by introducing conjugate Gamma priors over the inverse variance  $\beta$  and  $\{\alpha_{i,1}, \alpha_{i,2}\}_{i=1}^d$ :

$$\alpha_{i,1} \sim \text{Gamma}(\nu_{i,1}, \nu_{i,2}), \quad \alpha_{i,2} \sim \text{Gamma}(\nu_{i,3}, \nu_{i,4}), \quad \beta \sim \text{Gamma}(\nu_{0,1}, \nu_{0,2}).$$

Denote the set of Gamma prior parameters as  $\nu = \{\nu_{i,j}\}$  and all latent variables as

$$\xi = \{\beta, \{w_i, z_i, \alpha_{i,1}, \alpha_{i,2}\}_{i=1}^d\}.$$

Then the variable selection problem can be solved by estimating  $\pi = \{\pi_1, \pi_2, \dots, \pi_d\}$  with  $\pi_i = p(z_i = 1)$ . We can find the maximum likelihood estimator of the probability coefficient  $\pi$  of Bernoulli masks and then screen the variables if  $\pi_i$  is smaller than the pre-defined threshold  $\tau$ .

### C.2 Variational EM Algorithm

Given the dataset  $\{\mathbf{y}, \Phi\}$ , the maximum marginal likelihood estimator of  $(\pi, \nu)$  is given by

$$\begin{aligned} \hat{\pi}, \hat{\nu} &= \operatorname{argmax}_{\pi, \nu} \log p(\mathbf{y} | \Phi; \pi, \nu) \\ &= \operatorname{argmax}_{\pi, \nu} \log \int_{\xi} p(\mathbf{y}, \xi | \Phi; \pi, \nu) d\xi. \end{aligned} \quad (12)$$

However, direct maximization of (12) is intractable due to the integration over  $\xi$ . EM algorithm [66] might be a solution here. In the E-step, we compute the conditional expectation

$$\begin{aligned}\mathcal{L}(\boldsymbol{\pi}, \boldsymbol{\nu}; \boldsymbol{\pi}^{old}, \boldsymbol{\nu}^{old}) &= \mathbb{E}_{\xi} [\log p(\mathbf{y}, \xi | \Phi; \boldsymbol{\pi}, \boldsymbol{\nu}) | \mathbf{y}, \Phi; \boldsymbol{\pi}^{old}, \boldsymbol{\nu}^{old}] \\ &= \int \log p(\mathbf{y}, \xi | \Phi; \boldsymbol{\pi}, \boldsymbol{\nu}) p(\xi | \mathbf{y}, \Phi; \boldsymbol{\pi}^{old}, \boldsymbol{\nu}^{old}) d\xi,\end{aligned}$$

which involves inferring posterior  $p(\xi | \mathbf{y}, \Phi; \boldsymbol{\pi}, \boldsymbol{\nu})$ . However, this is not straightforward to obtain due to the complexity of our model setup. MCMC [57] is a common tool for this problem, but suffers from intensive computation, thus hard to extend to large-scale data. We instead use approximate Bayesian inference in Section C.3.

In the M-step, we update  $\boldsymbol{\pi}$  and  $\boldsymbol{\nu}$  by maximizing the expectation

$$\boldsymbol{\pi}^{new}, \boldsymbol{\nu}^{new} = \underset{\boldsymbol{\pi}, \boldsymbol{\nu}}{\operatorname{argmax}} \mathcal{L}(\boldsymbol{\pi}, \boldsymbol{\nu}; \boldsymbol{\pi}^{old}, \boldsymbol{\nu}^{old}).$$

By repeating the E and M steps, the estimator  $(\boldsymbol{\pi}^{new}, \boldsymbol{\nu}^{new})$  converges to an optimal solution. We show this method has satisfying performance for the underlying variable selection problems in synthetic data and the prevailing OoD dataset.

### C.3 Variational Inference

In the E-Step, computation of  $\mathbb{E}_{\xi} [\log p(\mathbf{y}, \xi | \Phi; \boldsymbol{\pi}, \boldsymbol{\nu}) | \mathbf{y}, \Phi; \boldsymbol{\pi}^{old}, \boldsymbol{\nu}^{old}]$  involves inferring posterior  $p(\xi | \mathbf{y}, \Phi; \boldsymbol{\pi}, \boldsymbol{\nu})$ . However, due to the complexity of our model setup, no analytical form of the posterior distribution can be found. We instead approximate true posterior distribution by variational inference [12]. The main idea involves the introduction of a set of distributions  $Q$ , which should ideally be easy to compute and provide a good approximation to the true posterior distribution. We consider the following transformation of the marginal likelihood

$$\begin{aligned}\ln p(\mathbf{y} | \Phi; \boldsymbol{\pi}, \boldsymbol{\nu}) &= \ln \int p(\mathbf{y}, \xi | \Phi; \boldsymbol{\pi}, \boldsymbol{\nu}) d\xi \\ &= \ln \int Q(\xi) \frac{p(\mathbf{y}, \xi | \Phi; \boldsymbol{\pi}, \boldsymbol{\nu})}{Q(\xi)} d\xi \\ &\geq \int Q(\xi) \ln \frac{p(\mathbf{y}, \xi | \Phi; \boldsymbol{\pi}, \boldsymbol{\nu})}{Q(\xi)} d\boldsymbol{\theta} \\ &= \mathcal{L}(Q),\end{aligned}$$

where  $\mathcal{L}(Q)$  denotes the variational lower bound. The key point is that, through proper choice of  $Q$  distribution,  $\mathcal{L}(Q)$  can be readily evaluated, and thus by maximizing the lower bound, we generally find the  $Q$  distribution, which is the best approximation within the considered family. Here we factorize  $Q$  over each latent variable, such that

$$Q(\boldsymbol{\xi}; \boldsymbol{\pi}, \boldsymbol{\nu}) = Q(\beta; \tilde{\nu}_{0,1}, \tilde{\nu}_{0,2}) \prod_{i=1}^d \left[ Q(z_i; \tilde{\pi}_i) Q(w_i; m_i, \lambda_i^{-1}) Q(\alpha_{i,1}; \tilde{\nu}_{i,1}, \tilde{\nu}_{i,2}) Q(\alpha_{i,2}; \tilde{\nu}_{i,3}, \tilde{\nu}_{i,4}) \right],$$

which holds for classic mean-field family [11]. By denoting  $\{\boldsymbol{m}, \boldsymbol{\lambda}, \tilde{\boldsymbol{\pi}}\} = \{m_i, \lambda_i, \pi_i\}_{i=1}^d$  and  $\tilde{\boldsymbol{\nu}} = \{\tilde{\nu}_{i,j}\}$ , an optimization-free form over all possible  $Q$  has been established, which can lead to minimization of KL divergence between variational distribution  $Q(\boldsymbol{\xi})$  and true posterior  $p(\boldsymbol{\xi} | \mathbf{y}, \Phi; \boldsymbol{\pi}, \boldsymbol{\nu})$

$$Q^*(\boldsymbol{\xi}_k) = \frac{\exp \mathbb{E}_{\boldsymbol{\xi}_{-k} \sim Q^*(\boldsymbol{\xi}_{-k})} \ln p(\mathbf{y}, \boldsymbol{\xi} | \Phi; \boldsymbol{\pi}, \boldsymbol{\nu})}{\int \exp \mathbb{E}_{\boldsymbol{\xi}_{-k} \sim Q^*(\boldsymbol{\xi}_{-k})} \ln p(\mathbf{y}, \boldsymbol{\xi} | \Phi; \boldsymbol{\pi}, \boldsymbol{\nu}) d\boldsymbol{\xi}_k},$$

where denote  $\boldsymbol{\xi}_k$  as the  $k$ -th variable in the set  $\boldsymbol{\xi}$  and  $\boldsymbol{\xi}_{-k}$  is the subset of all other variables except  $\boldsymbol{\xi}_k$ . For models in conjugate families, the optimal  $Q^*(\boldsymbol{\xi}_k)$  has the same form as its prior distribution. We then establish the optimization step for arbitrary variational parameters set  $\{\boldsymbol{m}, \boldsymbol{\lambda}, \tilde{\boldsymbol{\nu}}, \tilde{\boldsymbol{\pi}}\}$  to approach the true posterior:

$$m_i = f_m(\tilde{\pi}_i, \boldsymbol{m}, \tilde{\boldsymbol{\nu}}) = \left( \sum_{n=1}^N x_{n,i}^2 \mathbb{E}[\beta] + \tilde{\pi}_i \mathbb{E}[\alpha_{i,1}] + (1 - \tilde{\pi}_i) \mathbb{E}[\alpha_{i,2}] \right)^{-1} \cdot \left[ \mathbb{E}[\beta] \cdot \sum_{n=1}^N x_{n,i} \left( \sum_{\substack{j=1 \\ j \neq i}}^{d-1} m_j \cdot x_{n,j} - y_n \right) \right],$$

$$\begin{aligned}\tilde{\pi}_i &= f_{\pi_i}(\mathbf{m}, \boldsymbol{\lambda}, \tilde{\boldsymbol{\nu}}) = \frac{\exp\{\mathbb{E}\ln|\alpha_{i,1}| - \frac{1}{2}\mathbf{Tr}(\mathbb{E}[\alpha_{i,1}] \cdot \mathbb{E}[\mathbf{w}_i^2])\} + \ln\pi_i}{\exp\{\mathbb{E}\ln|\alpha_{i,1}| + \mathbb{E}\ln|\alpha_{i,2}| - \frac{1}{2}\mathbf{Tr}(\mathbb{E}[\alpha_{i,1}] + \mathbb{E}[\alpha_{i,2}] \cdot \mathbb{E}[\mathbf{w}_i^2])\} + \ln\pi_i + \ln(1 - \pi_i)}, \\ (\tilde{\nu}_{0,2})^{-1} &= f_{\nu_{0,2}}(\mathbf{m}, \boldsymbol{\lambda}) = \sum_{n=1}^N y_n^2 - 2 \sum_{n=1}^N \left( \sum_{i=1}^d m_i \cdot x_{n,i} \right) \cdot y_n + \sum_{n=1}^N \sum_{i,j}^d x_{n,i} \cdot x_{n,j} (\mathbb{E}[\mathbf{w}_i^2]) + \nu_{0,2}^{-1}, \\ (\tilde{\nu}_{i,2})^{-1} &= f_{\nu_{i,2}}(\mathbf{m}, \boldsymbol{\lambda}, \tilde{\boldsymbol{\pi}}) = (\mathbb{E}[\mathbf{w}_i^2])^{-1} \cdot \tilde{\pi}_i + \nu_{i,2}^{-1}, \quad (\tilde{\nu}_{i,4})^{-1} = f_{\nu_{i,4}}(\mathbf{m}, \boldsymbol{\lambda}, \tilde{\boldsymbol{\pi}}) = (\mathbb{E}[\mathbf{w}_i^2])^{-1} \cdot (1 - \tilde{\pi}_i) + \nu_{i,4}^{-1}, \\ \lambda_i &= f_{\lambda}(\tilde{\boldsymbol{\nu}}) = \sum_{n=1}^N x_{n,i}^2 \mathbb{E}[\beta] + \tilde{\pi}_i \mathbb{E}[\alpha_{i,1}] + (1 - \tilde{\pi}_i) \mathbb{E}[\alpha_{i,2}],\end{aligned}$$

$$\tilde{\nu}_{0,1} = f_{\nu_{0,1}}(n) = \nu_{0,1} + n, \quad \tilde{\nu}_{i,1} = f_{\nu_{i,1}}(\tilde{\boldsymbol{\pi}}) = \nu_{i,1} + \tilde{\pi}_i, \quad \tilde{\nu}_{i,3} = f_{\nu_{i,3}}(\tilde{\boldsymbol{\pi}}) = \nu_{i,3} + 1 - \tilde{\pi}_i,$$

where the variational expectations are given by

$$\mathbb{E}[\mathbf{w}_i^2] = m_i^2 + \lambda_i^{-1}, \quad \mathbb{E}[\beta] = \tilde{\nu}_{0,1} \cdot \tilde{\nu}_{0,2}, \quad \mathbb{E}[\alpha_{i,1}] = \tilde{\nu}_{i,1} \cdot \tilde{\nu}_{i,2}, \quad \mathbb{E}[\alpha_{i,2}] = \tilde{\nu}_{i,3} \cdot \tilde{\nu}_{i,4}, \quad (13)$$

$$\mathbb{E}\ln|\alpha_{i,1}| = \psi\left(\frac{\nu^{i,1}}{2}\right) + \ln 2 + \ln|\nu^{i,2}|, \quad \mathbb{E}\ln|\alpha_{i,2}| = \psi\left(\frac{\nu^{i,3}}{2}\right) + \ln 2 + \ln|\nu^{i,4}|. \quad (14)$$

Since the optimization steps for each variational parameter are mutually dependent, we can use coordinate gradient descent [12] starting by current  $Q(\boldsymbol{\xi})^{t-1}$  from the last iteration. After one-step optimization, variational parameters of  $Q(\boldsymbol{\xi})^t$  are used in computation of  $\mathbb{E}_{\boldsymbol{\xi} \sim Q(\boldsymbol{\xi}; \boldsymbol{\pi}^{old}, \boldsymbol{\nu}^{old})^t} [\log p(\mathbf{y} | \Phi, \boldsymbol{\xi}; \boldsymbol{\pi}, \boldsymbol{\nu})]$ , thus finishing E-step. During this procedure, the lower bound  $\mathcal{L}(Q)$  will continuously increase until reaching its maximum value. Therefore, the value of  $\mathcal{L}(Q)$  can be used as a useful indicator for convergence of algorithm [19].

#### C.4 Algorithm Details

The proposed model contains a set of prior hyper-parameters  $\boldsymbol{\pi}, \boldsymbol{\nu}$ , which is exactly what we want to estimate for feature screening. In Bayesian literature, hyper-parameter selection can be automated from data through a procedure named ‘‘ARD’’ [52]. The original ‘‘ARD’’ procedure proposes a selection based on the value of model evidence. However, in many cases including ours, this evidence is intractable. Fortunately, it’s also feasible to use variational lower bound  $\mathcal{L}(Q)$  as a substitute. Learning prior hyper-parameters  $\boldsymbol{\pi}, \boldsymbol{\nu}$  leads to the minimization of KL divergence. This can be rationalized by the decomposition of  $\mathcal{L}(Q)$ :

$$\begin{aligned}\mathcal{L}(Q) &= \mathbb{E}_{\boldsymbol{\xi} \sim Q(\boldsymbol{\xi})} [\log p(\mathbf{y} | \Phi, \boldsymbol{\xi}; \boldsymbol{\pi}, \boldsymbol{\nu})] \\ &= \mathbb{E}_{\boldsymbol{\xi} \sim Q(\boldsymbol{\xi})} [\log p(\mathbf{y} | \boldsymbol{\xi}, \Phi)] - \text{KL}(Q(\boldsymbol{\xi}) || p(\boldsymbol{\xi}; \boldsymbol{\pi}, \boldsymbol{\nu})).\end{aligned}$$

Thus by setting derivatives of each hyper-parameters with respect to  $\mathcal{L}(Q)$  to 0, it’s easy to see  $\mathcal{L}(Q)$  is maximized when all hyper-parameters are set to posterior parameters:

$$\boldsymbol{\pi}^{new} = \tilde{\boldsymbol{\pi}}, \quad \boldsymbol{\nu}^{new} = \tilde{\boldsymbol{\nu}}.$$

However, the proposed algorithm still suffers from heavy computational cost: Each iteration costs  $\mathcal{O}(nd^2)$ . Thus to relieve computation burden and memory usage, we leverage our method with stochastic approximation leading to the EM algorithm with stochastic variational inference [35]. In each iteration, we sample a random subset of entire data with size  $n^s$ . Fitting our algorithm over this subset for the current iteration, we obtain a local optimal estimator denoted by  $Q^s(\boldsymbol{\xi})$ . In M-step these intermediate variational distributions by factorizing  $Q^s(\boldsymbol{\xi})$  will be used to learn hyper-parameters  $\boldsymbol{\pi}$  and  $\boldsymbol{\nu}$  and simultaneously as the starting point for subsequent estimator in the next iteration. In the end, we successfully reduce the computation cost to  $\mathcal{O}(n^s d^2)$  with  $n^s \ll n$ , while maintaining the guarantee of convergence to the global optimum [65]. In our experiments, we collect variational probabilities of  $\{\tilde{\pi}_i\}_{i=1}^d$  from the last three runs and early-stop the algorithm if its difference with the current probability is smaller than the pre-defined threshold  $\epsilon$  or reaches the maximum iteration times. Variational EM algorithm for Bayesian feature selection is summarized in Algorithm 2. Note that we initialize  $\mathbf{m}$  by linear regression and the initialization of  $\tilde{\boldsymbol{\nu}}$  is set to  $\boldsymbol{\nu}$ .

In our experiments, we often deal with the multivariate case. If the underlying task involves multivariate regression or classification, i.e.,  $\mathbf{Y} \in \mathbb{R}^{n \times K}$ , we can run the proposed EM algorithm on each dimension and take the union of all selected features. Therefore, our feature selection procedure can be used in almost all prevailing models and tasks.

---

**Algorithm 2** Variational EM Algorithm for Bayesian Feature Selection
 

---

**Input:** The observed data  $\mathbf{Y} \in \mathbb{R}^n$ ,  $\mathbf{X} \in \mathbb{R}^{n \times d}$ ; Prior parameters  $\boldsymbol{\pi}^0 = \{\pi_i^0\}_{i=1}^d$  and  $\boldsymbol{\nu}^0 = \{\nu_{i,j}^0\}$ ; Maximum iteration step  $T$ ; Batch size  $n^s$ ; Stopping threshold  $\epsilon$ .

**Output:** Converged  $\boldsymbol{\pi}^t$  and  $\boldsymbol{\nu}^t$ .

- 1: Initialization of variational moment:  $\{\mathbf{m}, \boldsymbol{\lambda}, \mathbb{E}[\alpha_{i,1}], \mathbb{E}[\alpha_{i,2}], \mathbb{E}|\ln|\alpha_{i,1}|, \mathbb{E}|\ln|\alpha_{i,2}|\}_{i=1}^d$ :
    - Initialize  $\mathbf{m}^0$  by linear regression between  $\mathbf{Y}$  and  $\mathbf{X}$ , and let  $\boldsymbol{\lambda}^0 = (\mathbf{m}^0 \odot \mathbf{m}^0)^{-1}$ ;
    - Set  $\tilde{\boldsymbol{\nu}}^0 = \boldsymbol{\nu}^0$  and compute  $E[\alpha_{i,1}], E[\alpha_{i,2}], \mathbb{E}|\ln|\alpha_{i,1}|, \mathbb{E}|\ln|\alpha_{i,2}|$  by Equation (13) and (14);
  - 2: **for**  $1 \leq t \leq T$  **do**
  - 3: Random Sampling a data subset with size  $n^s$ ;
  - 4: Update  $\tilde{\nu}_{0,1}^t$  and  $\tilde{\nu}_{0,2}^t$  by  $f_{\nu_{0,1}^{t-1}}(n^s)$  and  $f_{\nu_{0,2}^{t-1}}(\mathbf{m}^{t-1}, \boldsymbol{\lambda}^{t-1})$ ;
  - 5: **for**  $1 \leq i \leq d$  **do**
  - 6: Update each  $\tilde{\pi}_i^t$  by  $f_{\tilde{\pi}_i^{t-1}}(\mathbf{m}^{t-1}, \boldsymbol{\lambda}^{t-1}, \tilde{\boldsymbol{\nu}}^{t-1})$ ;
  - 7: Update each  $\tilde{\nu}_{i,1}^t, \tilde{\nu}_{i,2}^t, \tilde{\nu}_{i,3}^t, \tilde{\nu}_{i,4}^t$  by  $f_{\nu_{i,1}^{t-1}}(\tilde{\boldsymbol{\pi}}^t), f_{\nu_{i,2}^{t-1}}(\mathbf{m}^{t-1}, \boldsymbol{\lambda}^{t-1}, \tilde{\boldsymbol{\pi}}^{t-1}), f_{\nu_{i,3}^{t-1}}(\tilde{\boldsymbol{\pi}}^t), f_{\nu_{i,4}^{t-1}}(\mathbf{m}^{t-1}, \boldsymbol{\lambda}^{t-1}, \tilde{\boldsymbol{\pi}}^t)$ ;
  - 8: Update  $m_i^t$  and  $\lambda_i^t$  by  $f_m(\tilde{\pi}_i^t, \mathbf{m}^{t-1}, \tilde{\boldsymbol{\nu}}^t)$  and  $f_\lambda(\tilde{\boldsymbol{\nu}}^t)$ ;
  - 9: **end for**
  - 10: Update  $\boldsymbol{\pi}^t = \tilde{\boldsymbol{\pi}}^t, \boldsymbol{\nu}^t = \tilde{\boldsymbol{\nu}}^t$ ;
  - 11: **if**  $t \geq 3$  **then**
  - 12:  $\boldsymbol{\pi}^{mean} = (\boldsymbol{\pi}^{t-2} + \boldsymbol{\pi}^{t-1} + \boldsymbol{\pi}^t)/3$ ;
  - 13: **Early Stop** if  $|\boldsymbol{\pi}^t - \boldsymbol{\pi}^{mean}| < \epsilon$ ;
  - 14: **end if**
  - 15: **end for**
- 

### C.5 Theoretical Result

It has been shown that our method, as well as others in Bayesian variable selection, has potentially strong selection consistency [48, 16, 83, 86]. Consider the following model with inverse Gamma prior:

$$\begin{aligned}
 y_n | (\phi(x_n), \mathbf{w}, \sigma^2) &\sim \mathcal{N}(\mathbf{w}\phi(x_n), \sigma^2 I), \\
 \mathbf{w}_i | (\sigma^2, z_i = 0) &\sim \mathcal{N}(0, \sigma^2 \tau_{0,N}^2), \\
 \mathbf{w}_i | (\sigma^2, z_i = 1) &\sim \mathcal{N}(0, \sigma^2 \tau_{1,N}^2), \\
 p(z_i = 1) &= 1 - p(z_i = 0) = q_N, \\
 \sigma^2 &\sim \text{IG}(\alpha_1, \alpha_2),
 \end{aligned} \tag{15}$$

where  $i$  runs from 1 to  $d$ ,  $q_N, \tau_{0,N}, \tau_{1,N}$  are constants that depend on sample size  $N$ , and  $\text{IG}(\alpha_1, \alpha_2)$  is the Inverse Gamma distribution with shape parameter  $\alpha_1$  and scale parameter  $\alpha_2$ . Under regular conditions (See conditions 4.1–4.5 in [56]), selection consistency is established:

**Theorem 1.** *Assume regular conditions hold, under the model with inverse Gamma prior, we have  $p(\mathbf{z} = t | \mathbf{Y}, \sigma^2) \xrightarrow{p} 1$  as  $n \rightarrow \infty$ , that is, the posterior probability of the true model goes to 1 as the sample size increases to  $\infty$ .*

More related works on Bayesian feature selection can be found in [26, 55].

### C.6 Simulation Study

In this section, we will conduct a series of simulations to verify selection performance on an *i.i.d.* dataset with varying sizes and dimensions. Here, we consider cases in the standard multivariate regression. We first generate each input predictor from a standard normal distribution:  $x_{ni} \sim N(0, 1)$  for  $i = 1, \dots, d$ , and thus we generate response variables by subsequently sampling  $\beta_j \sim \text{Uniform}(1, 3)$  for  $j = 1, \dots, k < d$  and  $y_n \sim N(\sum_{i=1}^k \beta_i x_{ni}, 1)$ . We then vary the values of  $d$  and  $k$  to find the potential influence in terms of True Positive Rate (TPR) and False Positive Rate (FPR). The results are shown in Table 9.

We repeat each case 50 times and present the mean and variance of TPR and FPR. The hyper-parameter setting is listed in Table 8. We vary  $n^s$  to study the influence of batch size. Overall, our method

illustrates the experimental selection consistency. When  $n > d$ , our method almost always selects the correct  $k$  variables with TPR close to 100% and successfully screens all unnecessary variables with FPR equal to 0%. Even under the less informative circumstance when  $n$  has an equal or less amount than  $d$ , our method can still achieve great selection results with TPR above 90%. As  $n$  goes up, there is a uniform improvement in all cases in terms of TPR and FPR.

Table 8: Hyper-parameters setting in feature selection.

| $\pi_i$ | $\nu_{0,1}$ | $\nu_{0,2}$ | $\nu_{i,1}$ | $\nu_{i,2}$ | $\nu_{i,3}$ | $\nu_{i,4}$ | $T$  | $n^s$ | $\epsilon$ |
|---------|-------------|-------------|-------------|-------------|-------------|-------------|------|-------|------------|
| 0.5     | 1           | 1           | 1           | 1           | 5           | 1           | 1000 | 256   | 0.5        |

Table 9: Feature selection in terms of TPR/FPR.

| <b>d=100</b> | k   | n   | $n^s$ | TPR             | FPR            |
|--------------|-----|-----|-------|-----------------|----------------|
| Case 1       | 50  | 200 | 64    | 99.92%±0.39%    | 0.00%±0.00%    |
| Case 2       | 50  | 200 | 128   | 99.92% ± 0.39%  | 0.00%±0.00%    |
| Case 3       | 50  | 400 | 64    | 100.00% ± 0.00% | 0.00%±0.00%    |
| Case 4       | 50  | 400 | 128   | 100.00% ± 0.00% | 0.00%±0.00%    |
| Case 5       | 90  | 200 | 64    | 99.86%±0.42%    | 0.00%±0.00%    |
| Case 6       | 90  | 200 | 128   | 99.93% ± 0.26%  | 0.00% ± 0.00%  |
| Case 7       | 90  | 400 | 64    | 100.00% ± 0.00% | 0.00% ± 0.00%  |
| Case 8       | 90  | 400 | 128   | 100.00% ± 0.00% | 0.00% ± 0.00%  |
| <b>d=300</b> | k   | n   | $n^s$ | TPR             | FPR            |
| Case 1       | 100 | 300 | 64    | 95.21%±2.22%    | 2.16%±1.52%    |
| Case 2       | 100 | 300 | 256   | 96.46% ± 2.12%  | 2.31% ± 2.10%  |
| Case 3       | 100 | 500 | 64    | 99.92% ± 0.27%  | 0.00% ± 0.00%  |
| Case 4       | 100 | 500 | 256   | 100.00% ± 0.00% | 0.00% ± 0.00%  |
| Case 5       | 250 | 300 | 64    | 91.34%±2.92%    | 11.92%±6.79%   |
| Case 6       | 250 | 300 | 256   | 91.95% ± 2.40%  | 14.56% ± 8.35% |
| Case 7       | 250 | 500 | 64    | 99.92% ± 0.17%  | 0.00% ± 0.00%  |
| Case 8       | 250 | 500 | 256   | 99.92% ± 0.05%  | 0.00% ± 0.00%  |
| <b>d=500</b> | k   | n   | $n^s$ | TPR             | FPR            |
| Case 1       | 100 | 450 | 64    | 92.70%±2.56%    | 4.41%±1.67%    |
| Case 2       | 100 | 450 | 256   | 92.89% ± 2.69%  | 4.90% ± 1.82%  |
| Case 3       | 100 | 800 | 64    | 99.94% ± 0.23%  | 0.00% ± 0.00%  |
| Case 4       | 100 | 800 | 512   | 100.00% ± 0.00% | 0.00% ± 0.00%  |
| Case 5       | 450 | 500 | 64    | 90.21%±2.56%    | 12.68%±6.38%   |
| Case 6       | 450 | 500 | 256   | 92.06% ± 1.84%  | 16.04% ± 6.69% |
| Case 7       | 450 | 800 | 64    | 99.92% ± 0.13%  | 0.00% ± 0.00%  |
| Case 8       | 450 | 800 | 512   | 100.00% ± 0.00% | 0.00% ± 0.00%  |
